# Supplementary material
Source: PubMed Central journal article supplement (PMC3565533)
Supplement: NIHMS433859-supplement-1_si_001.pdf [file NIHMS433859-supplement-1_si_001.pdf]

Supporting Information for:

*Conversion of Fe-NH<sub>2</sub> to Fe-N<sub>2</sub> with release of NH<sub>3</sub>*

John S. Anderson, Marc-Etienne Moret, and Jonas C. Peters

- Figure 1.** <sup>1</sup>H NMR Spectrum of (TPB)FeMe (**1**)
- Figure 2.** <sup>1</sup>H NMR Spectrum of [(TPB)Fe][BAr<sup>F</sup><sub>4</sub>] (**2**)
- Figure 3.** <sup>1</sup>H NMR Spectrum of [(TPB)Fe(N<sub>2</sub>H<sub>4</sub>)][BAr<sup>F</sup><sub>4</sub>] (**3**)
- Figure 4.** <sup>1</sup>H NMR Spectrum of [(TPB)Fe(NH<sub>3</sub>)][BAr<sup>F</sup><sub>4</sub>] (**4**)
- Figure 5.** <sup>1</sup>H NMR Spectrum of (TPB)FeNH<sub>2</sub> (**5**)
- Figure 6.** <sup>1</sup>H NMR Spectrum of (TPB)FeOH (**6**)
- Figure 7.** 10 K EPR Spectrum of (TPB)FeMe (**1**)
- Figure 8.** 10 K EPR Spectrum of [(TPB)Fe][BAr<sup>F</sup><sub>4</sub>] (**2**)
- Figure 9.** 10 K EPR Spectrum of [(TPB)Fe(N<sub>2</sub>H<sub>4</sub>)][BAr<sup>F</sup><sub>4</sub>] (**3**)
- Figure 10.** 10 K EPR Spectrum of [(TPB)Fe(NH<sub>3</sub>)][BAr<sup>F</sup><sub>4</sub>] (**4**)
- Figure 11.** 10 K EPR Spectrum of (TPB)FeNH<sub>2</sub> (**5**)
- Figure 12.** 10 K EPR Spectrum of (TPB)FeOH (**6**)
- Figure 13.** UV-Vis Spectrum of (TPB)FeMe (**1**)
- Figure 14.** UV-Vis Spectrum of [(TPB)Fe][BAr<sup>F</sup><sub>4</sub>] (**2**)
- Figure 15.** UV-Vis Spectrum of [(TPB)Fe(N<sub>2</sub>H<sub>4</sub>)][BAr<sup>F</sup><sub>4</sub>] (**3**)
- Figure 16.** UV-Vis Spectrum of [(TPB)Fe(NH<sub>3</sub>)][BAr<sup>F</sup><sub>4</sub>] (**4**)
- Figure 17.** UV-Vis Spectrum of (TPB)FeNH<sub>2</sub> (**5**)
- Figure 18.** UV-Vis Spectrum of (TPB)FeOH (**6**)
- Figure 19.** Titration of THF into an ethereal solution of **2**
- Figure 20.** NMR traces of the monitored decomposition of **3** to **4**
- Figure 21.** Kinetic plots of the monitored decomposition of **3** to **4**

**Figure 22.** Geometries of  $[(\text{TPB})\text{Fe}]^+$  and  $[(\text{Me}_2\text{PhP})_3\text{Fe}]^+$  optimized at the B3LYP/6-31G(d) level

**Figure 23.** MO and spin density diagram of  $[(\text{TPB})\text{Fe}]^+$  optimized at the B3LYP/6-31G(d) level

**Figure 24.** MO diagram offering a tentative explanation for the T-shaped distortion of **2**

**Figure 25.** Variable Temperature Magnetic data for **2-5**

**Table 1.** Product quantification for the decomposition of **3** to **4**

**Table 2.** Crystal data and structure refinement for (TPB)FeMe (**1**)

**Table 3.** Crystal data and structure refinement for  $[(\text{TPB})\text{Fe}][\text{BAr}^{\text{F}}_4]$  (**2**)

**Table 4.** Crystal data and structure refinement for  $[(\text{TPB})\text{Fe}(\text{N}_2\text{H}_4)][\text{BAr}^{\text{F}}_4]$  (**3**)

**Table 5.** Crystal data and structure refinement for  $[(\text{TPB})\text{Fe}(\text{NH}_3)][\text{BAr}^{\text{F}}_4]$  (**4**)

**Table 6.** Crystal data and structure refinement for (TPB)FeNH<sub>2</sub> (**5**)

**Table 7.** Crystal data and structure refinement for (TPB)FeOH (**6**)

**Figure 26.** Crystal Structure for (TPB)FeOH (**6**)

## ***General Considerations***

Unless otherwise noted, all compounds were prepared by literature procedures or purchased from commercial sources. All manipulations were carried out under a dinitrogen atmosphere by utilizing standard glovebox or schlenk techniques. Solvents were dried and de-oxygenated by an argon sparge followed by passage through an activated alumina column purchased from S.G. Waters Company. All non-halogenated solvents were tested with a standard sodium-benzophenone ketyl solution to ensure the absence of oxygen and water.

## ***NMR***

NMR measurements were obtained on Varian 300, 400, or 500 MHz spectrometers. Deuterated solvents for these measurements were obtained from Cambridge Isotope Laboratories and were dried and degassed prior to use. All  $^1\text{H}$  spectra were referenced to residual solvent peaks and all  $^{31}\text{P}$  spectra were referenced to an external  $\text{H}_3\text{PO}_4$  standard.

## ***EPR***

EPR X-band spectra were obtained on a Bruker EMX spectrometer with the aid of Bruker Win-EPR software suite version 3.0. The spectrometer was equipped with a rectangular cavity which operated in the  $\text{TE}_{102}$  mode. Temperature control was achieved with the use of an Oxford continuous-flow helium cryostat (temperature range 3.6 – 300 K). All spectra were recorded at 9.37 GHz with a microwave power of 20 mW, a modulation amplitude of 4 G, and a modulation frequency of 100 kHz.

## ***X-Ray Crystallography***

Data was obtained at low temperatures on a Siemens or Bruker Platform three-circle diffractometer coupled to a Bruker-AXS Smart Apex CCD detector with graphite-monochromated  $\text{Mo K}\alpha$  radiation ( $\lambda = 0.71073$ ), performing  $\varphi$ - and  $\omega$ -scans. Data for complex **4** was collected on with synchrotron radiation at the Stanford Synchrotron Radiation Laboratory (SSRL) beam line 12-2 at 17 keV using a single phi axis and recorded on a Dectris Pilatus 6M. The images were processed using XDS<sup>1</sup> and further workup of the data was analogous to the other datasets. All structures were solved by standard direct or Patterson methods and refined against  $F^2$  using the SHELX program package.<sup>2,3,4</sup> All atoms, with the exception of hydrogens, have been anisotropically refined. The hydrogen atoms bonded to atoms of interest, namely N or O, have been located in the difference map and refined semi-freely. All other hydrogen atoms were included via a standard riding model.

In the structure of complex **1** a minor component of (TPB)FeCl was found in the difference map and modeled as disorder. Additional disorder of the  $\text{BAr}_4^{\text{F}}$  counterion was found in complex **4**. This disorder was modeled as a rotational disorder of the  $\text{CF}_3$  groups on one of the phenyl rings, but some of the resulting F ellipsoids still display significantly prolate shapes. We

<sup>1</sup> W. Kabsch, *J. Appl. Cryst.* **1993**, *26*, 795.

<sup>2</sup> Sheldrick, G. M. *Acta Cryst.* **1990**, *A46*, 467.

<sup>3</sup> Sheldrick, G. M. *Acta Cryst.* **2004**, *A64*, 112.

<sup>4</sup> Müller, P. *Crystallography Reviews* **2009**, *15*, 57.

feel that the shape of these ellipsoids accurately describes the actual electron density due to the rotational disorder.

### ***Magnetic Measurements.***

Data was obtained using a Quantum Designs SQUID magnetometer running MPMSR2 software (Magnetic Property Measurement System Revision 2) at a field strength of 50000 G. Complexes were massed and then suspended in eicosane wax. Samples were then inserted into the magnetometer in plastic straws sealed under nitrogen with gelatin capsules. Loaded samples were centered within the magnetometer using the DC centering scan at 35 K. Data were acquired at 20-30 K (one data point every 2 K), and 30-300 K (one data point every 10 K). The magnetic susceptibility was adjusted for diamagnetic contributions using the constitutive corrections of Pascal's constants as well as a diamagnetic correction for the eicosane and capsule. Data workup, including simulations, was performed in the JulX software package.<sup>5</sup> Complex **5** displayed a lower than expected magnetic moment. NMR analysis of the sample indicated the presence of ~15% 12-crown-4, present as a result of the protocol for generation of the complex, where it is used to aid for removal of NaBAR<sub>4</sub><sup>F</sup>. Accounting for this impurity leads to a magnetic moment consistent with the other samples.

### ***Computational Methods***

Geometry optimizations were performed using the Gaussian03 package.<sup>6</sup> The B3LYP exchange-correlation functional was employed with a 6-31G(d) basis set. The GDIIS algorithm was used. A full frequency calculation was performed on each structure to establish true minima. A model for the initial geometry of complex **2** used the crystallographically determined coordinates as a starting point for subsequent minimization. Atoms were then stripped away from this structure to reveal a Fe(PMe<sub>2</sub>Ph)<sub>3</sub><sup>+</sup> as the starting point to determine the theoretical structure of Fe(PMe<sub>2</sub>Ph)<sub>3</sub><sup>+</sup> by another minimization. Structural models and orbital/spin density pictures were generated from Gaussview 03.

---

<sup>5</sup> [http://ewww.mpi-muelheim.mpg.de/bac/logins/bill/julX\\_en.php](http://ewww.mpi-muelheim.mpg.de/bac/logins/bill/julX_en.php)

<sup>6</sup> Gaussian 03, Revision E.01, M. J. Frisch, G. W. Trucks, H. B. Schlegel, G. E. Scuseria, M. A. Robb, J. R. Cheeseman, J. A. Montgomery, Jr., T. Vreven, K. N. Kudin, J. C. Burant, J. M. Millam, S. S. Iyengar, J. Tomasi, V. Barone, B. Mennucci, M. Cossi, G. Scalmani, N. Rega, G. A. Petersson, H. Nakatsuji, M. Hada, M. Ehara, K. Toyota, R. Fukuda, J. Hasegawa, M. Ishida, T. Nakajima, Y. Honda, O. Kitao, H. Nakai, M. Klene, X. Li, J. E. Knox, H. P. Hratchian, J. B. Cross, V. Bakken, C. Adamo, J. Jaramillo, R. Gomperts, R. E. Stratmann, O. Yazyev, A. J. Austin, R. Cammi, C. Pomelli, J. W. Ochterski, P. Y. Ayala, K. Morokuma, G. A. Voth, P. Salvador, J. J. Dannenberg, V. G. Zakrzewski, S. Dapprich, A. D. Daniels, M. C. Strain, O. Farkas, D. K. Malick, A. D. Rabuck, K. Raghavachari, J. B. Foresman, J. V. Ortiz, Q. Cui, A. G. Baboul, S. Clifford, J. Cioslowski, B. B. Stefanov, G. Liu, A. Liashenko, P. Piskorz, I. Komaromi, R. L. Martin, D. J. Fox, T. Keith, M. A. Al-Laham, C. Y. Peng, A. Nanayakkara, M. Challacombe, P. M. W. Gill, B. Johnson, W. Chen, M. W. Wong, C. Gonzalez, and J. A. Pople, Gaussian, Inc., Wallingford CT, 2004.

### **Synthesis of (TPB)FeMe, 1**

(TPB)FeBr (0.400 g, 0.55 mmol) was dissolved in 15 mL of ether and cooled to  $-35^{\circ}\text{C}$ . To this stirred solution was added a 1.6 M solution of MeLi in ether (0.620 mL, 0.99 mmol). After addition the solution was allowed to warm to room temperature and was stirred for an additional hour over which time the solution changed in color from a dark brown to a deep orange red. After this time, volatiles were removed and the remaining solids were extracted with 3 mL of benzene three times. Lyophilization of benzene resulted in a dark orange powder which was washed with 5 mL of cold pentane to yield (TPB)FeMe (0.352 g, 97%). X-ray quality crystals were grown from slow evaporation of a concentrated pentane solution of **1**.  $^1\text{H}$  NMR ( $\text{C}_6\text{D}_6$ ,  $\delta$ ): 74.48 (br s), 33.25 (s), 22.52 (s), 9.31 (br s), 5.73 (s), 2.65 (s), -2.33 (br s), -2.80 (s), -7.49 (br s), -16.33 (s). UV-Vis (THF)  $\lambda_{\text{max}}$ , nm ( $\epsilon$ ,  $\text{M}^{-1}\text{cm}^{-1}$ ): 840 (120). Anal. Calc. for  $\text{C}_{37}\text{H}_{57}\text{BF}_2\text{FeP}_3$ : C 67.19; H 8.69. Found: C 67.26; H 8.59. Solution magnetic moment ( $\text{C}_6\text{D}_6$ ): 3.9  $\mu_{\text{B}}$ .

### **Synthesis of [(TPB)Fe][BAR<sup>F</sup><sub>4</sub>] 2**

A dark orange solution of **1** (0.037 g, 0.06 mmol) in 5 mL of  $\text{Et}_2\text{O}$  was cooled to  $-35^{\circ}\text{C}$ . Once cooled, the solution was stirred while a similarly cooled solution of  $\text{HBAR}^{\text{F}}_4 \cdot 2\text{Et}_2\text{O}$ <sup>7</sup> in 5 mL of  $\text{Et}_2\text{O}$  was added dropwise over 5 min. After the addition, the solution was stirred at room temperature for an additional hour before being concentrated down to 1 mL. This solution was layered with 1 mL of pentane and cooled to  $-35^{\circ}\text{C}$  for 2 days upon which time dark orange crystals of [(TPB)Fe][BAR<sup>F</sup><sub>4</sub>] had formed (0.082 g, 97%).  $^1\text{H}$  NMR ( $\text{C}_6\text{D}_6/\text{THF}-d_8$ ,  $\delta$ ): 32.15 (br s), 25.78 (s), 23.99 (br s), 8.93 (br s), 8.27 (s, BAR<sup>F</sup><sub>4</sub>), 4.55 (br s), 1.84 (br s), -1.24 (br s), -28.05 (s). UV-Vis ( $\text{Et}_2\text{O}$ )  $\lambda_{\text{max}}$ , nm ( $\epsilon$ ,  $\text{M}^{-1}\text{cm}^{-1}$ ): 475 (1700), 765 (800). Anal. Calc. for  $\text{C}_{68}\text{H}_{66}\text{B}_2\text{F}_{24}\text{FeP}_3$ : C 54.10; H 4.41. Found: C 53.93; H 4.53.

### **Synthesis of [(TPB)Fe(N<sub>2</sub>H<sub>4</sub>)] [BAR<sup>F</sup><sub>4</sub>], 3**

**2** (0.356 g, 0.24 mmol) was dissolved in 10 mL in  $\text{Et}_2\text{O}$  and stirred. To this was added  $\text{N}_2\text{H}_4$  (0.076 mL, 2.36 mmol) in one portion. Upon addition, the solution lightened slightly in color to a brown-orange. The solution was allowed to stir for 15 min before the solution was concentrated to 5 mL and layered with 5 mL of pentane. After 2 days at  $-35^{\circ}\text{C}$ , dark orange crystals of [(TPB)Fe( $\text{N}_2\text{H}_4$ )] [BAR<sup>F</sup><sub>4</sub>] had formed (0.324 g, 89%).  $^1\text{H}$  NMR ( $\text{C}_6\text{D}_6/\text{THF}-d_8$ ,  $\delta$ ): 53.72 (br s), 28.26 (s), 25.32 (s), 20.18 (br s), 8.28 (s, BAR<sup>F</sup><sub>4</sub>), 7.67 (s, BAR<sup>F</sup><sub>4</sub>), 8.14 (br s), 7.96 (br s), 3.00 (br s), 2.67 (br s), 0.30 (br s), -26.06 (s). UV-Vis (THF)  $\lambda_{\text{max}}$ , nm ( $\epsilon$ ,  $\text{M}^{-1}\text{cm}^{-1}$ ): 800 (140). Anal. Calc. for  $\text{C}_{68}\text{H}_{70}\text{B}_2\text{F}_{24}\text{FeN}_2\text{P}_3$ : C 52.98; H 4.58; N 1.82. Found: C 53.03; H 4.63; N 1.70. Solution magnetic moment (THF- $d^8$ ): 3.46  $\mu_{\text{B}}$ .

### **Synthesis of [(TPB)Fe(NH<sub>3</sub>)] [BAR<sup>F</sup><sub>4</sub>], 4**

<sup>7</sup> Brookhart, M.; Grant, B.; Volpe, A. F. *Organometallics* **1992**, *11*, 3920-3922.

A solution of **3** (0.308 g, 0.20 mmol) in 10 mL of 1:6 THF:Benzenes was rapidly stirred at RT for 12 h. After this time, the volatiles were removed in vacuo and the residue was taken up in Et<sub>2</sub>O, filtered, and layered with pentane before being cooled to -35°. After 2 days, dark orange-red crystals of [(TPB)Fe(NH<sub>3</sub>)][(BAR<sup>F</sup><sub>4</sub>)] had formed (0.264 g, 87%). <sup>1</sup>H NMR (C<sub>6</sub>D<sub>6</sub>/THF-d<sub>8</sub>, δ): 68.22 (br s), 28.55 (s), 24.28 (s), 17.81 (br s), 8.34 (s, BAR<sup>F</sup><sub>4</sub>), 7.68 (s, BAR<sup>F</sup><sub>4</sub>), 5.74 (br s), 3.53 (s), 2.15 (br s), 1.22 (br s), -25.48 (s). UV-Vis (THF) λ<sub>max</sub>, nm (ε, M<sup>-1</sup> cm<sup>-1</sup>): 871 (50). IR (KBr, cm<sup>-1</sup>): 3381 (ν[NH]). Anal. Calc. for C<sub>68</sub>H<sub>69</sub>B<sub>2</sub>F<sub>24</sub>FeNP<sub>3</sub>: C 54.24; H 4.55; N 0.92. Found: C 53.47; H 4.72; N 0.94. Solution magnetic moment (THF- d<sub>8</sub>): 3.63 μ<sub>B</sub>.

### **Synthesis of (TPB)FeNH<sub>2</sub>, 5**

A solution of **2** (0.300 g, 0.20 mmol) in 5 mL of Et<sub>2</sub>O was stirred over powdered NaNH<sub>2</sub> (0.077 g, 1.99 mmol) for 1.5 h at room temperature. Over this time, the solution darkened from orange to a dark brown. Volatiles were removed and the remaining residue was extracted with 40 mL of pentane to yield a pale orange solution. To this solution was added 12-crown-4 (0.070 g, 0.40 mmol) to aid in the removal of NaBAR<sup>F</sup><sub>4</sub>, and solids began to precipitate. The solution was allowed to stand for 1 h before filtration. Removal of solvent for 3 h at 70° C resulted in (TPB)FeNH<sub>2</sub> as a dark orange powder (0.060 g, 0.09 mmol, 46%). Crystals suitable for X-ray diffraction were grown from slow evaporation of a concentrated ethereal solution. Due to the presence of a small amount of 12-crown-4 that had similar solubility properties to the product, satisfactory combustion analysis was not obtained for **5**. <sup>1</sup>H NMR (C<sub>6</sub>D<sub>6</sub>, δ): 91.12 (br s), 38.21 (s), 25.42 (s), 4.12 (br s), 1.55 (br s), 0.21 (br s), -3.04 (br s), -5.93 (br s), -20.19(s). UV-Vis (THF) λ<sub>max</sub>, nm (ε, M<sup>-1</sup> cm<sup>-1</sup>): 700 (90), 930 (80). Solution magnetic moment (C<sub>6</sub>D<sub>6</sub>): 4.05 μ<sub>B</sub>. We also wish to note that trace amounts (<3%) of the neutral complex (TPB)Fe(N<sub>2</sub>) are typically detected by NMR spectroscopy in preparations of **5**. (TPB)Fe(N<sub>2</sub>) and **5** also have similar solubility properties.

### **Synthesis of (TPB)FeOH, 6**

**2** (0.80 g, 0.05 mmol) was dissolved in 5 mL of Et<sub>2</sub>O and stirred over NaOH (0.063 g, 1.6 mmol) at room temperature for 2 h during which the color of the solution darkened to a deep brown. Volatiles were removed from the solution and the resulting solids were extracted with pentane to yield Synthesis of (TPB)FeOH (0.027, 77%) as a brown powder. Crystals suitable for X-Ray diffraction were grown by a slow evaporation of a concentrated Et<sub>2</sub>O solution. <sup>1</sup>H NMR (C<sub>6</sub>D<sub>6</sub>, δ): 89.55 (br s), 39.07 (s), 24.70 (s), 6.71 (s), 4.08 (s), 1.55 (br s), -0.52 (br s), -6.00 (br s), -21.02 (s). UV-Vis (THF) λ<sub>max</sub>, nm (ε, M<sup>-1</sup> cm<sup>-1</sup>): 870 (230), 700 (218). Anal. Calc. for C<sub>36</sub>H<sub>55</sub>BFeOP<sub>3</sub>: C 65.18; H 8.36; N 0. Found: C 65.15; H 8.28; N none found. Solution magnetic moment (C<sub>6</sub>D<sub>6</sub>): 4.12 μ<sub>B</sub>.

### **Protonation of 5**

A 20 mL scintillation vial was charged with **5** (0.005 g, 0.007 mmol) and HBAR<sup>F</sup><sub>4</sub>·2Et<sub>2</sub>O (0.008 g, 0.007 mmol) and cooled to -35° C. 2 mL of similarly cooled Et<sub>2</sub>O was added to the

mixture and the color of the solution lightened rapidly. The solution was allowed to warm to room temperature over 30 minutes before volatiles were removed to yield **4** (0.010 g, 0.006 mmol, 91%). The identity of the product was determined via  $^1\text{H}$  NMR which was identical to that observed for **4**.

### ***Reduction of 4***

A 20 mL scintillation vial was charged with **4** (0.025 g, 0.016 mmol) and  $\text{KC}_8$  (0.0024 g, 0.018 mmol). 2 mL of  $\text{Et}_2\text{O}$  were added and the resulting dark suspension was allowed to stir for 2 h at RT. After this time, the solution was filtered and volatiles were removed to yield (TPB)Fe( $\text{N}_2$ ) as a brown solid. The identity of the product was determined via  $^1\text{H}$  NMR which was identical to the previously reported values for (TPB)Fe( $\text{N}_2$ ).

### ***Monitored Conversion of 3 to 4***

**3** (0.020 g, 0.013 mmol) was dissolved in a 6:1 mixture of  $\text{C}_6\text{D}_6$ :THF- $d_8$ . The resulting solution was transferred to an NMR tube equipped with a capillary containing a solution of (TPB)FeBr in a 6:1 mixture of  $\text{C}_6\text{D}_6$ :THF- $d_8$  as an internal standard. This NMR tube was sealed with a J-Young valve and was placed into a 500 MHz spectrometer which had been preheated to 60° C. The reaction was monitored via single scans every minute for 4 hours during which time complete and clean conversion from **3** to **4** was observed. After the reaction was complete, an aliquot of the headspace was analyzed by GC for the presence of  $\text{H}_2$ . After this, volatiles were vacuum transferred onto a solution of HCl in THF. After this, volatiles were removed and the resulting solids were diluted with water to appropriate volumes to test for the presence of  $\text{NH}_3$  via the indophenol test,<sup>8</sup> or  $\text{N}_2\text{H}_4$  with *p*-dimethylaminobenzaldehyde.<sup>9</sup> The relative amounts of products are compiled in Table 1 of this document.

---

<sup>8</sup> Weatherburn, M.W. *Anal. Chem.* **1967**, *39*, 971-974.

<sup>9</sup> Watt, G. W.; Chrisp, J. D. *Anal. Chem.* **1952**, *24*, 2006-2008.

**Figure 1.**  $^1\text{H}$  NMR Spectrum of (TPB)FeMe in  $\text{C}_6\text{D}_6$  (1)

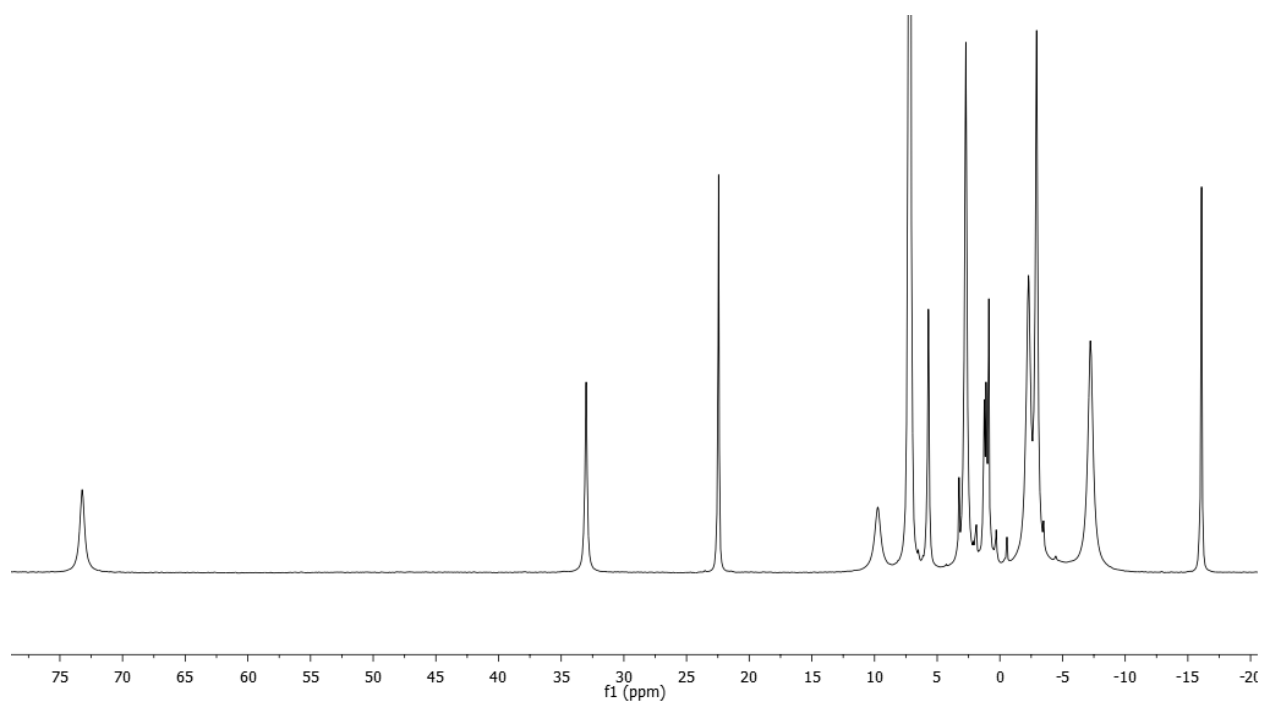

**Figure 2.**  $^1\text{H}$  NMR Spectrum of [(TPB)Fe][ $\text{BAR}^{\text{F}}_4$ ] in a 6:1 mixture of  $\text{C}_6\text{D}_6$ :THF- $d_8$  (2)

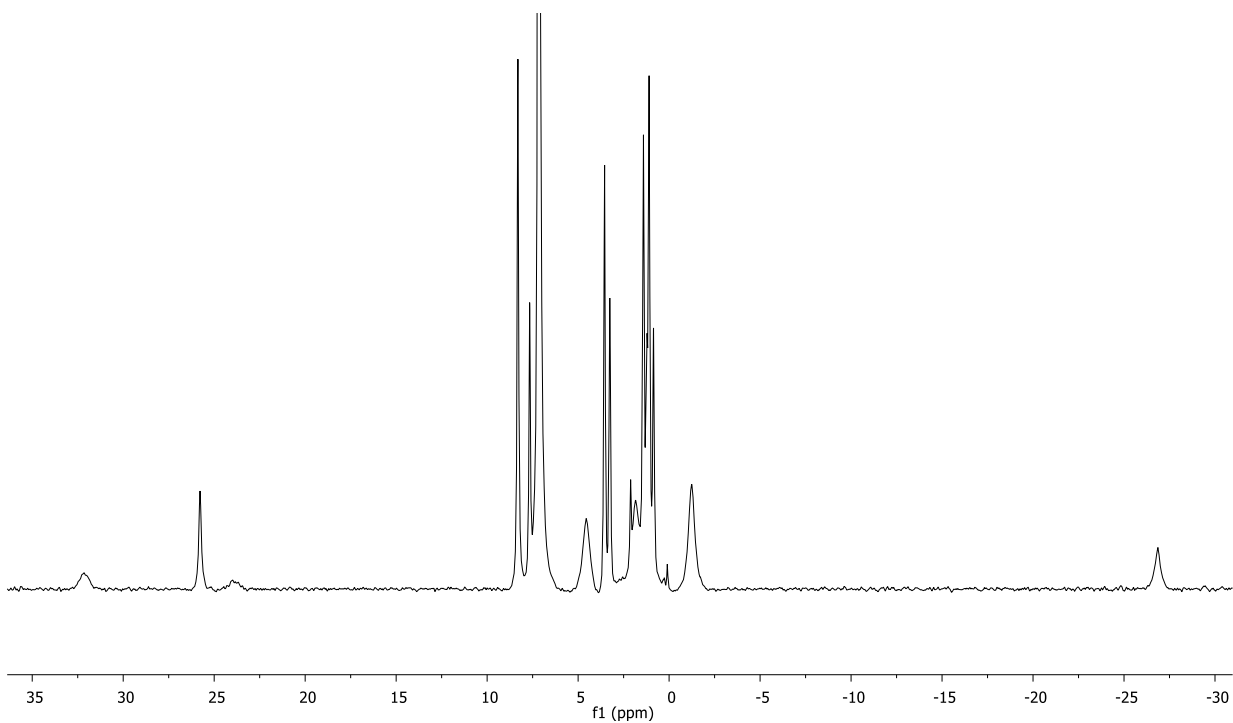



**Figure 3.**  $^1\text{H}$  NMR Spectrum of  $[(\text{TPB})\text{Fe}(\text{N}_2\text{H}_4)][\text{BAr}^{\text{F}}_4]$  in a 6:1 mixture of  $\text{C}_6\text{D}_6$ : $\text{THF-}d_8$  (**3**)

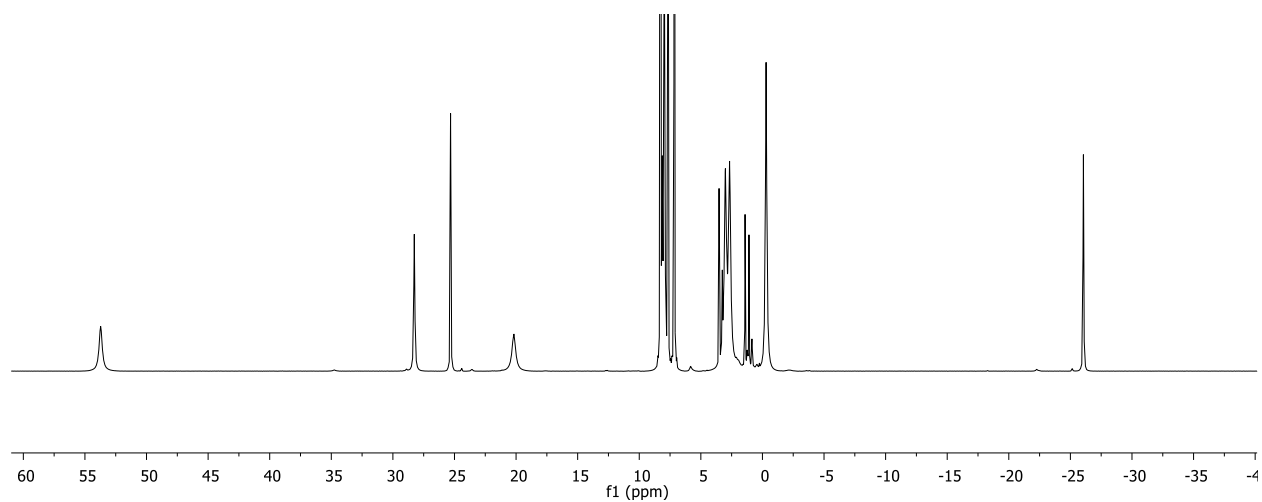

**Figure 4.**  $^1\text{H}$  NMR Spectrum of  $[(\text{TPB})\text{Fe}(\text{NH}_3)][\text{BAr}^{\text{F}}_4]$  in a 6:1 mixture of  $\text{C}_6\text{D}_6$ : $\text{THF-}d_8$  (**4**)

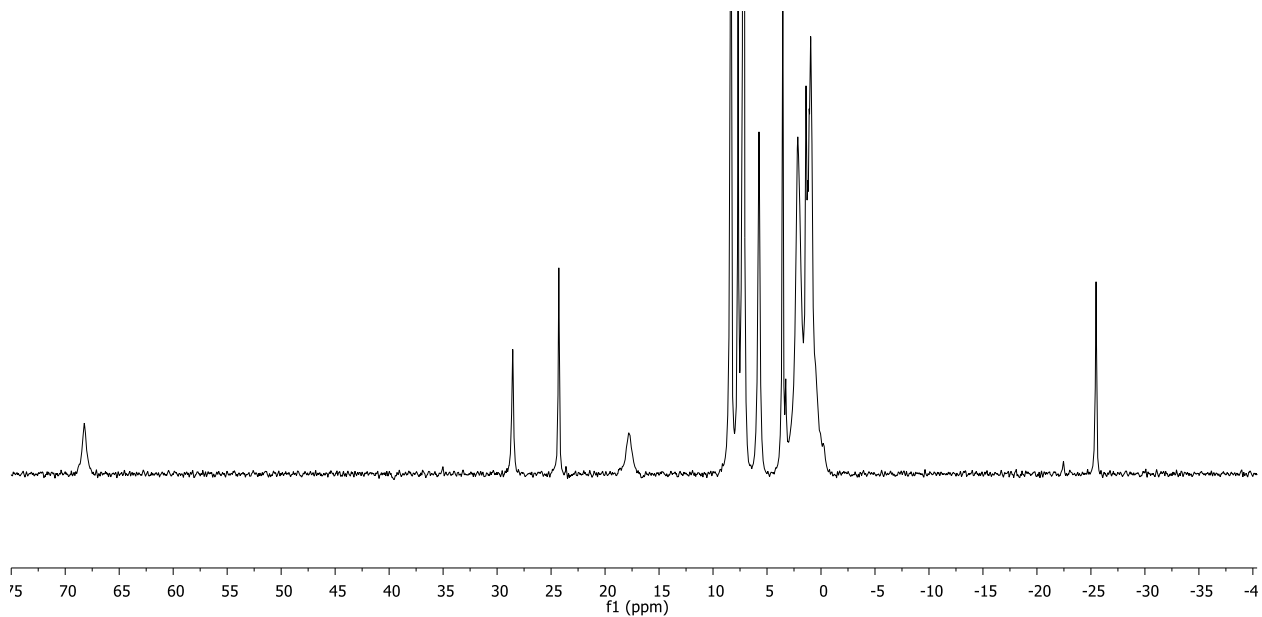

**Figure 5.**  $^1\text{H}$  NMR Spectrum of  $(\text{TPB})\text{FeNH}_2$  in  $\text{C}_6\text{D}_6$  (**5**)

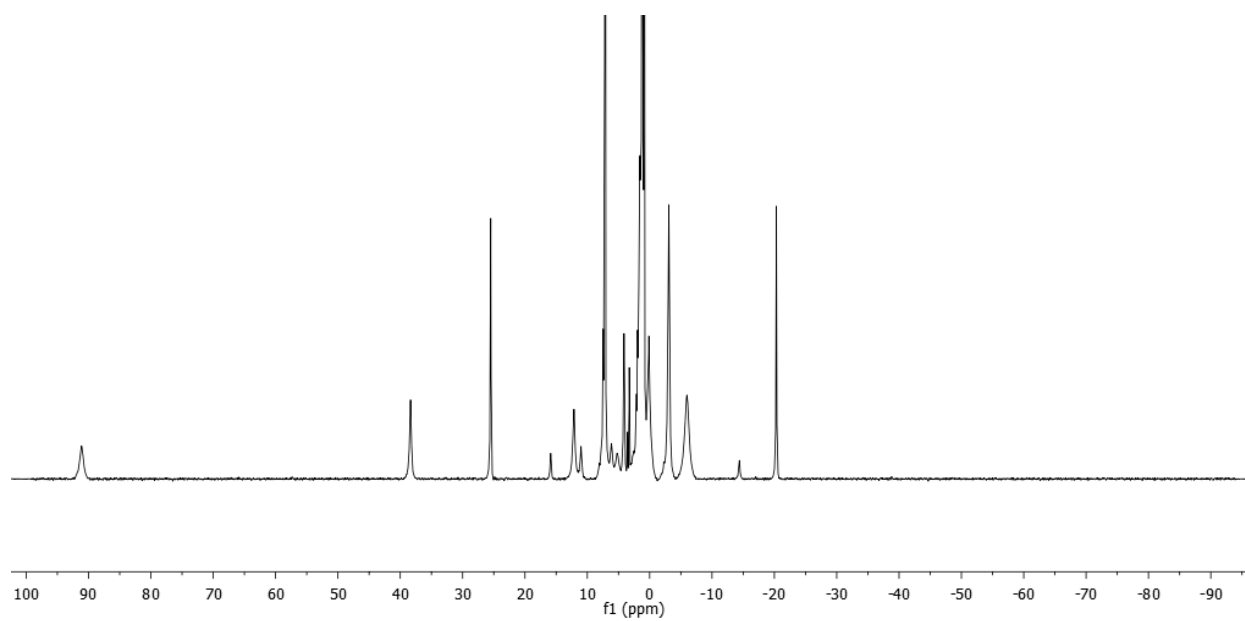

**Figure 6.**  $^1\text{H}$  NMR Spectrum of  $(\text{TPB})\text{FeOH}$  in  $\text{C}_6\text{D}_6$  (**6**)

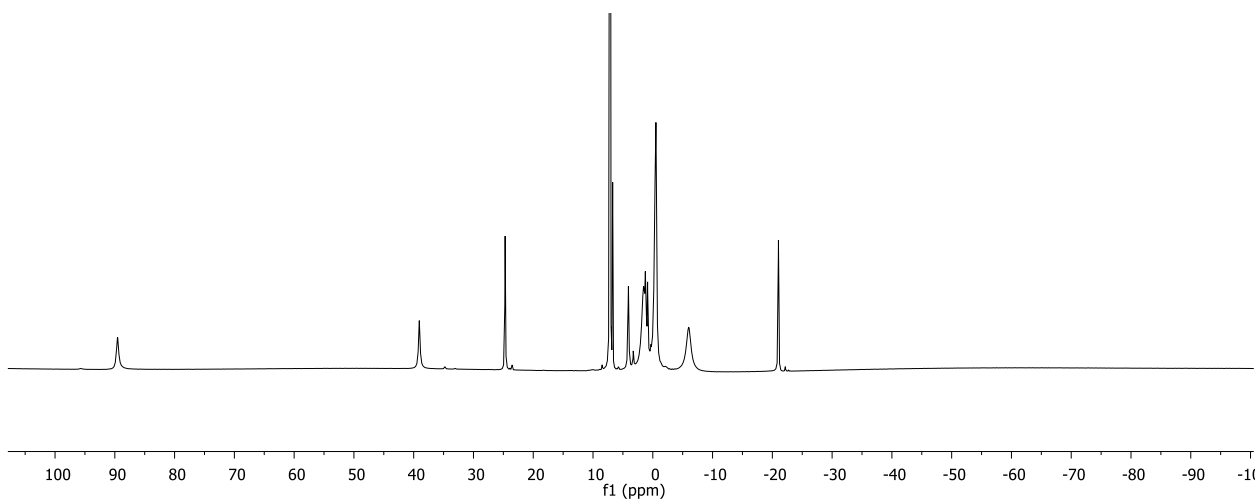

**Figure 7.** 8 K EPR Spectrum of (TPB)FeMe in Toluene (1)

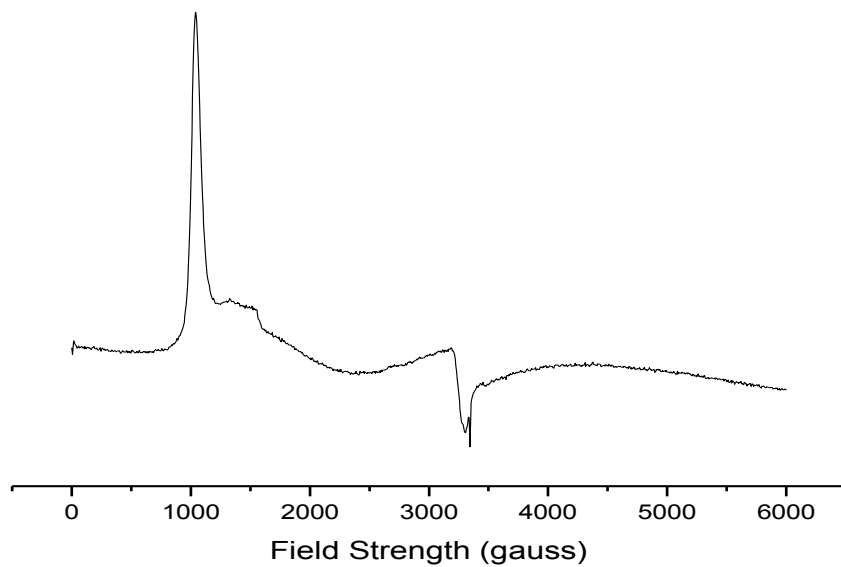

**Figure 8.** 10 K EPR Spectrum of [(TPB)Fe][BAr<sup>F</sup><sub>4</sub>] in 2:1 Toluene:Et<sub>2</sub>O (2)

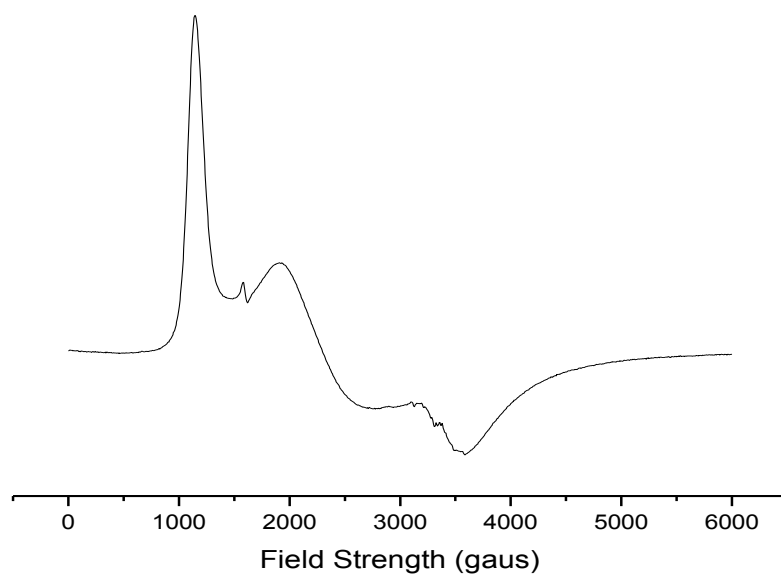

**Figure 9.** 10 K EPR Spectrum of  $[(\text{TPB})\text{Fe}(\text{N}_2\text{H}_4)][\text{BAr}^{\text{F}}_4]$  in 2-MeTHF (3)

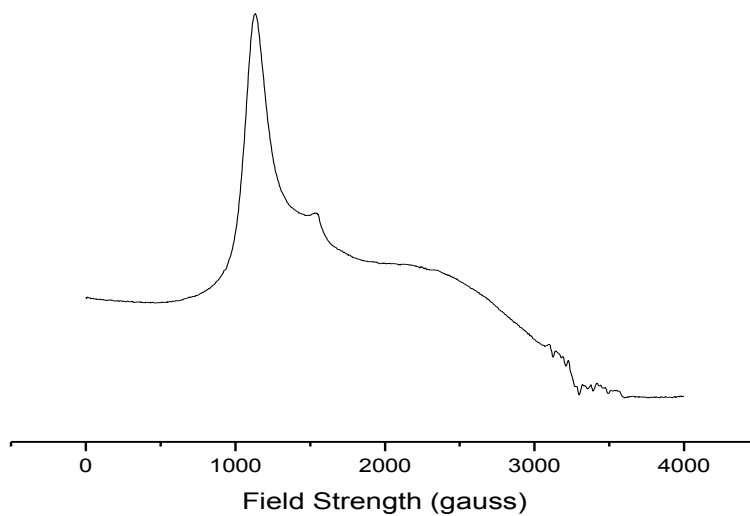

**Figure 10.** 10 K EPR Spectrum of  $[(\text{TPB})\text{Fe}(\text{NH}_3)][\text{BAr}^{\text{F}}_4]$  in 2-MeTHF (4)

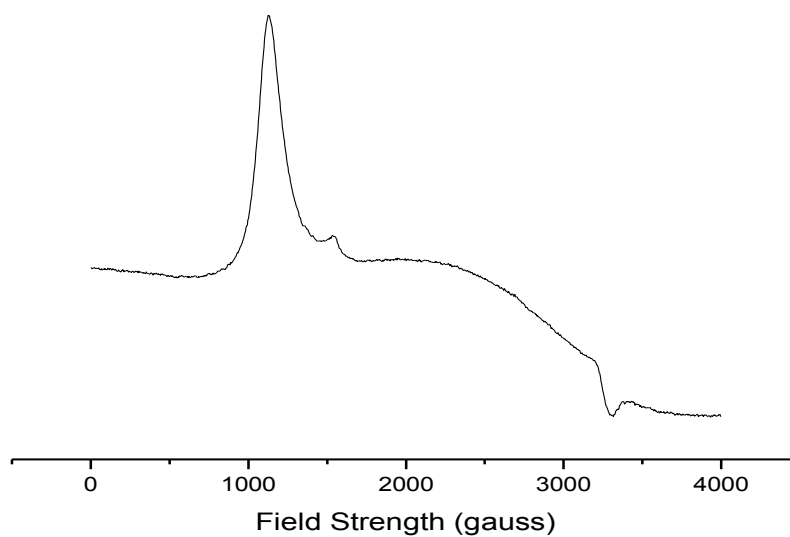

**Figure 11.** 10 K EPR Spectrum of (TPB)FeNH<sub>2</sub> in 2-MeTHF (5)

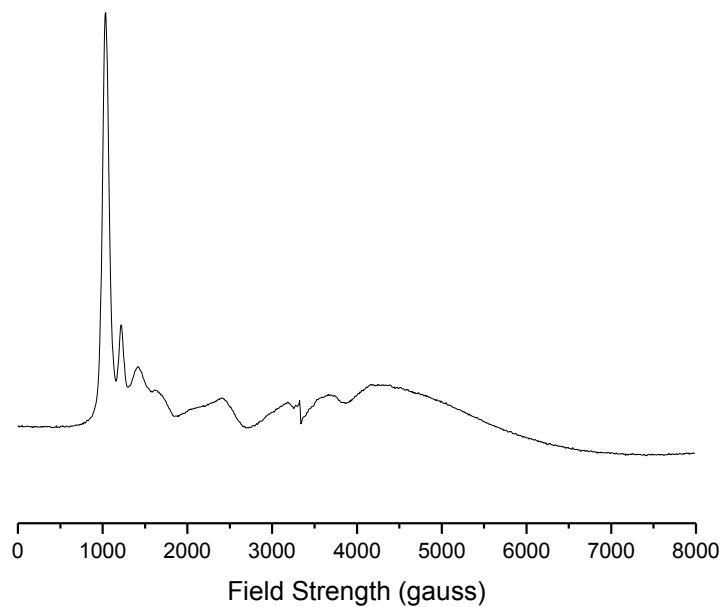

**Figure 12.** 10 K EPR Spectrum of (TPB)FeOH in Toluene (6)

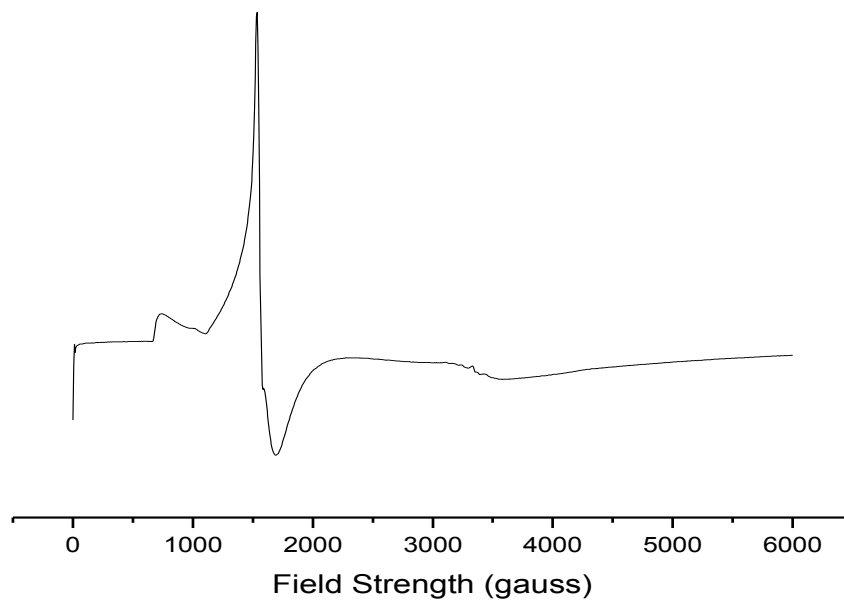

**Figure 13.** UV-Vis Spectrum of (TPB)FeMe in THF (1)

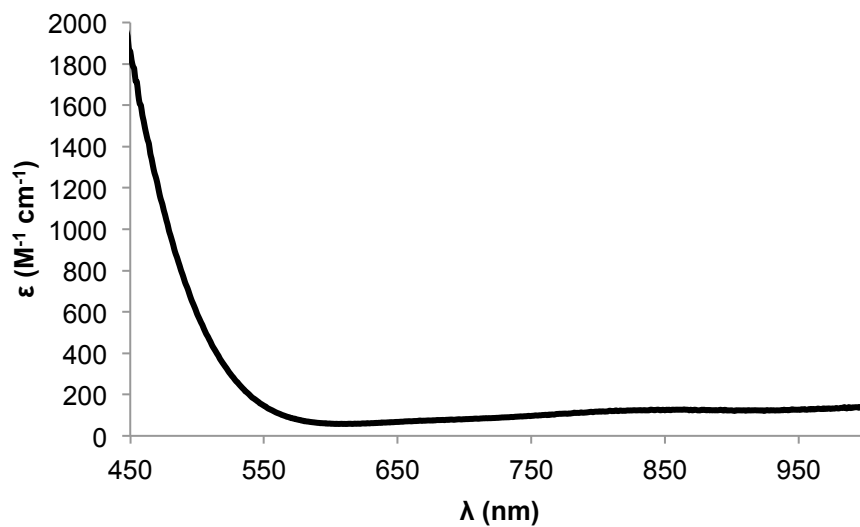

**Figure 14.** UV-Vis Spectrum of [(TPB)Fe][BAr<sup>F</sup><sub>4</sub>] in Et<sub>2</sub>O (2)

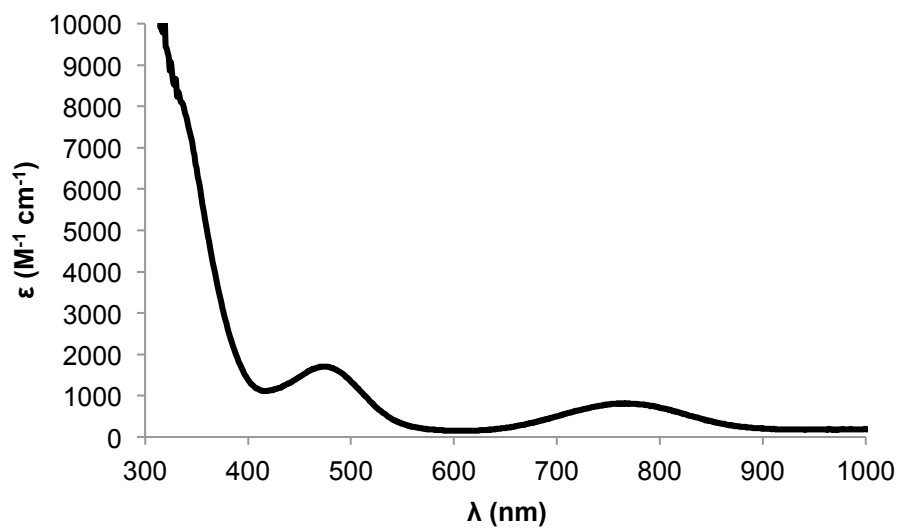

**Figure 15.** UV-vis Spectrum of [(TPB)Fe(N<sub>2</sub>H<sub>4</sub>)][BAr<sup>F</sup><sub>4</sub>] in THF (3)

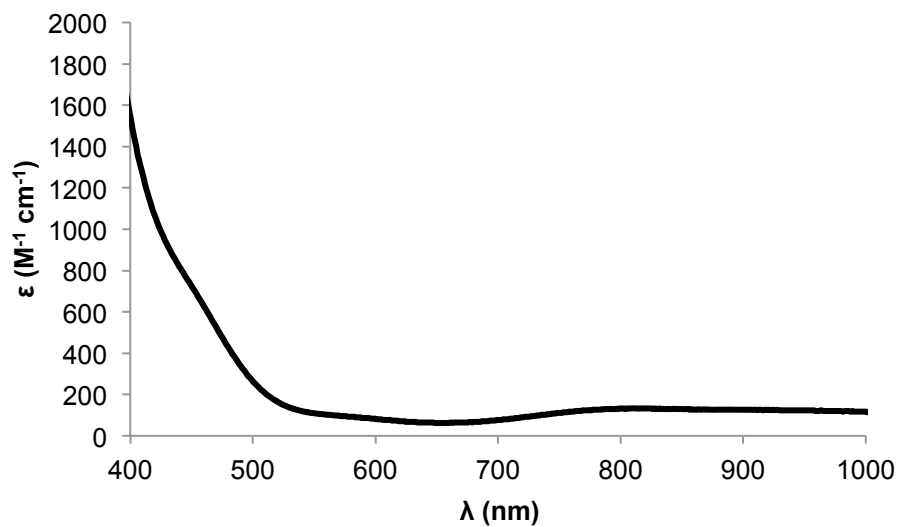

**Figure 16.** UV-vis Spectrum of [(TPB)Fe(NH<sub>3</sub>)] [BAr<sup>F</sup><sub>4</sub>] in THF (4)

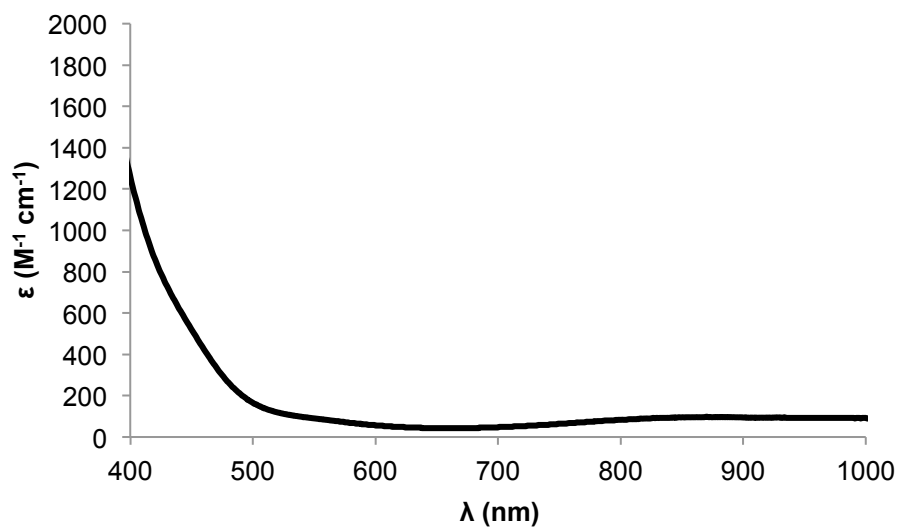

**Figure 17.** UV-vis Spectrum of (TPB)FeNH<sub>2</sub> in THF (5)

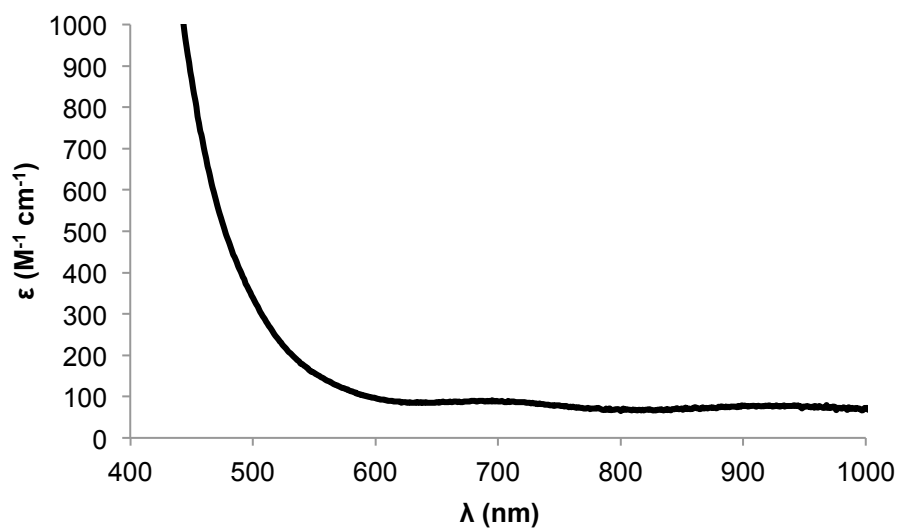

**Figure 18.** UV-Vis Spectrum of (TPB)FeOH in THF (6)

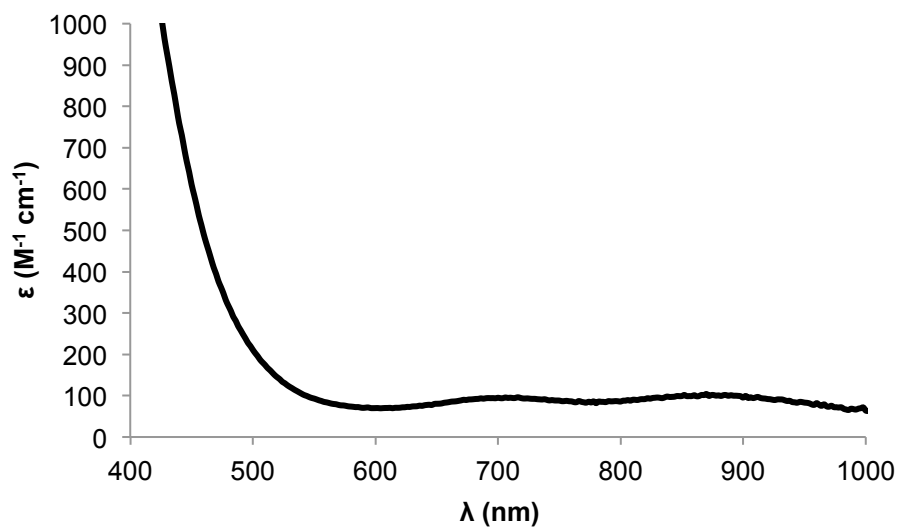



**Figure 19.** Titration of THF into a 4 mL ethereal solution of **2**

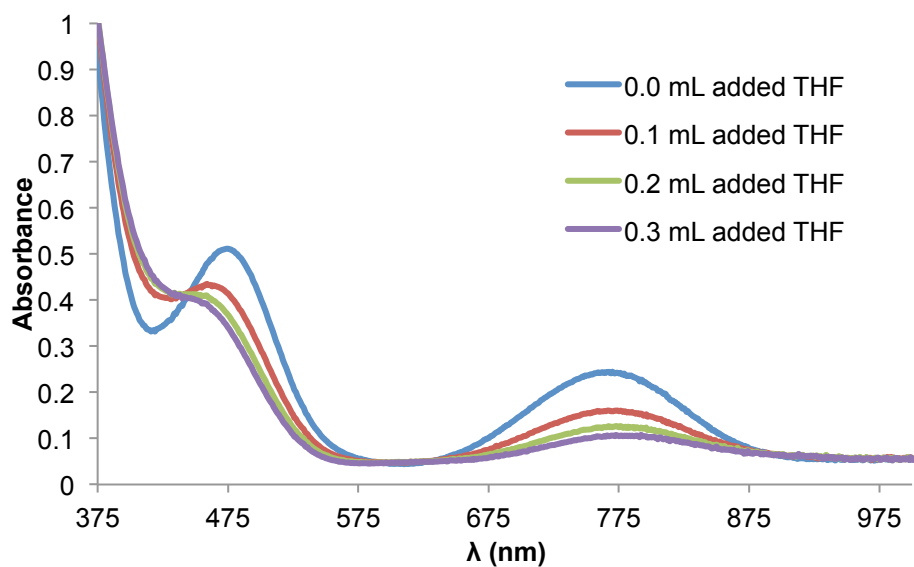

**Figure 20.** NMR traces of the monitored decomposition of **3** to **4**

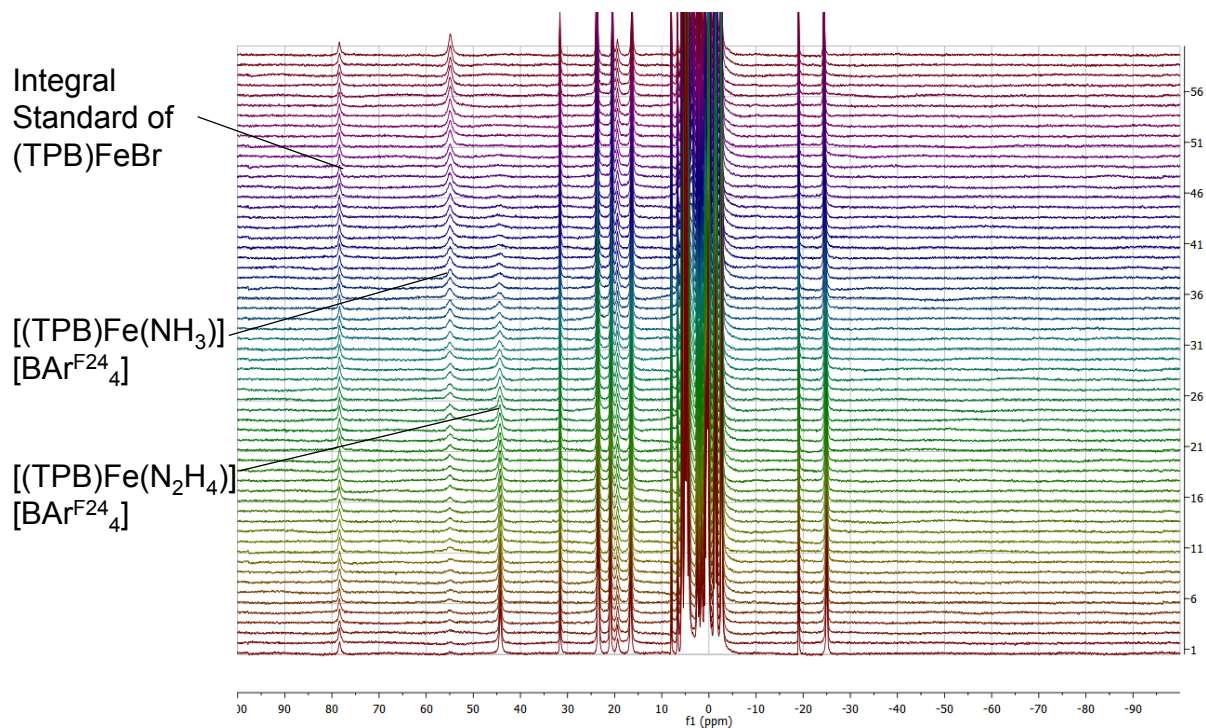

Conditions: 0.037 M, C<sub>6</sub>D<sub>6</sub>/THF-d<sub>8</sub>, 60 °C, Total time = 4h. Only 2<sup>nd</sup> hour is shown.

**Figure 21.** Kinetic plots of the monitored decomposition of **3** to **4**

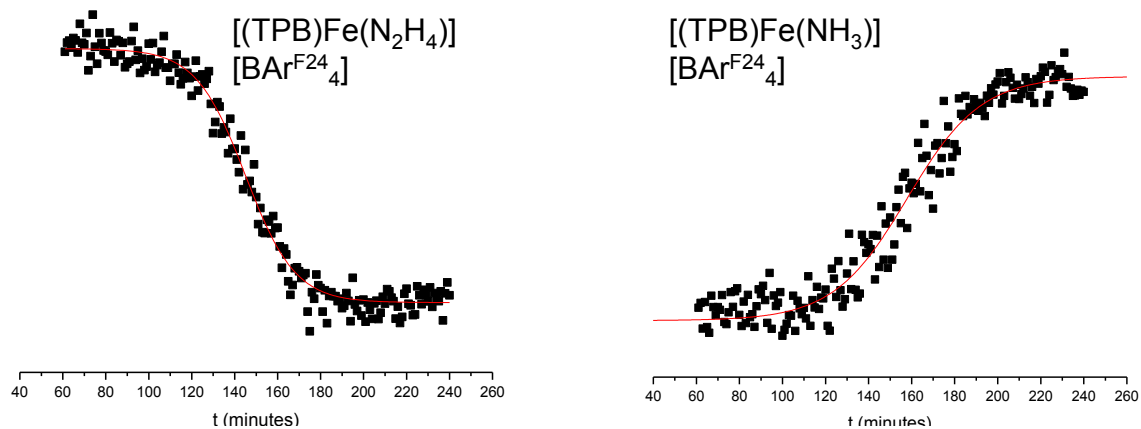

Kinetic traces obtained from  $^1\text{H}$  NMR integration. The red lines may serve as guides to the eye. No appreciable reaction occurred over the first 60 minutes of the reaction.

**Figure 22.** Geometries of  $[(\text{TPB})\text{Fe}]^+$  and  $[(\text{Me}_2\text{PhP})_3\text{Fe}]^+$  optimized at the B3LYP/6-31G(d) level

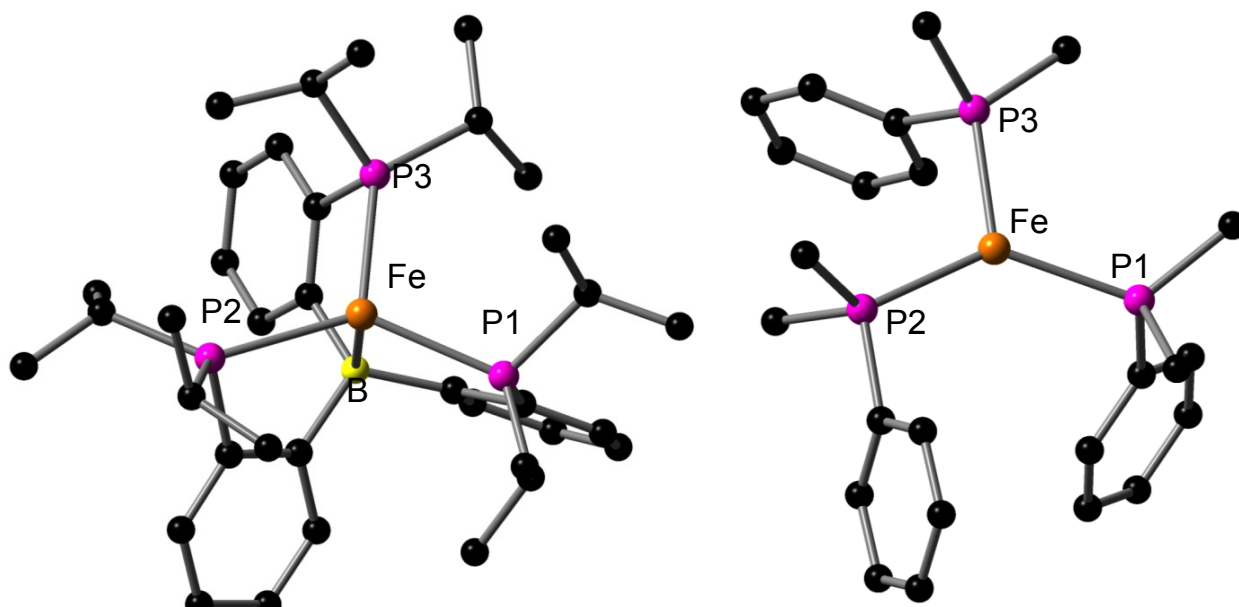

Selected bond distances [Å] and angles [°]: [(TPB)Fe]<sup>+</sup>: Fe–P1 2.426, Fe–P2 2.481, Fe–P3 2.460, Fe–B 2.189, P1–Fe–P2 137.5, P1–Fe–P3 109.1, P2–Fe–P3 113.2; [(Me<sub>2</sub>PhP)<sub>3</sub>Fe]<sup>+</sup>: Fe–P1 2.359, Fe–P2 2.328, Fe–P3 2.350, P1–Fe–P2 134.8, P1–Fe–P3 113.1, P2–Fe–P3 111.7.

**Optimized coordinates [Å] for [(TPB)Fe]<sup>+</sup>:**

|    |             |             |             |
|----|-------------|-------------|-------------|
| Fe | 0.00415000  | -0.16241600 | -0.77675900 |
| P  | -2.16349100 | -1.24719000 | -0.66738800 |
| P  | 2.39121900  | -0.83777200 | -0.74771500 |
| P  | -0.31345400 | 2.27645200  | -0.74537300 |
| C  | 2.09021700  | -1.73435800 | 0.82972400  |
| C  | 4.02952400  | 1.02631900  | 0.64266200  |
| H  | 3.98567100  | 0.45071500  | 1.57275400  |
| H  | 3.19104000  | 1.72365500  | 0.64140500  |
| H  | 4.95767100  | 1.60939200  | 0.65520800  |
| C  | -2.51735800 | -0.85749000 | 1.09566800  |
| C  | -2.75787900 | 2.84164700  | 0.59302900  |
| H  | -2.24972100 | 3.20855200  | 1.49066600  |
| H  | -2.90111300 | 1.76680700  | 0.71127400  |
| H  | -3.74621500 | 3.31410800  | 0.55282800  |
| C  | 0.96713000  | -1.34366200 | 1.61726000  |
| C  | 0.68267900  | 1.41376900  | 1.69824000  |
| C  | -3.77585900 | -1.11913600 | 1.66212900  |
| H  | -4.53614800 | -1.64204200 | 1.09100300  |
| C  | -1.50541500 | -0.21277600 | 1.85301900  |
| C  | -1.85207300 | 0.20954700  | 3.15263700  |
| H  | -1.11562400 | 0.74145000  | 3.74897600  |
| C  | 0.63534800  | 3.23145700  | -2.06275600 |
| H  | 0.57728600  | 4.28918000  | -1.78194000 |
| C  | 1.88147700  | 2.83955400  | 3.29296500  |
| H  | 2.40769300  | 2.94283300  | 4.23815900  |
| C  | 0.69310600  | -2.13340400 | 2.75608400  |
| H  | -0.16599700 | -1.88793000 | 3.37259400  |
| C  | 4.03129200  | 0.10104900  | -0.58072200 |
| H  | 4.06604600  | 0.72216800  | -1.48419000 |
| C  | 1.38189800  | 1.59489600  | 2.90786900  |
| H  | 1.54195100  | 0.73989400  | 3.56048800  |
| B  | 0.03447200  | -0.03107800 | 1.40854000  |
| C  | 5.27977700  | -0.79677000 | -0.55921200 |
| H  | 6.17024200  | -0.16055800 | -0.49330400 |
| H  | 5.38965200  | -1.41148800 | -1.45674600 |
| H  | 5.28761200  | -1.45308000 | 0.31716600  |
| C  | 1.72157800  | 3.94568000  | 2.45737900  |
| H  | 2.12008100  | 4.91463800  | 2.74408600  |
| C  | 1.05459100  | 3.79624400  | 1.24157800  |
| H  | 0.95646000  | 4.65573100  | 0.58420600  |
| C  | 2.77223500  | -2.14130600 | -2.05044100 |
| H  | 3.66239200  | -2.68641700 | -1.71685100 |
| C  | -4.07155000 | -0.72325700 | 2.96514500  |
| H  | -5.04800100 | -0.93619400 | 3.39051300  |
| C  | -3.10700900 | -0.04189100 | 3.70690700  |

|   |             |             |             |
|---|-------------|-------------|-------------|
| H | -3.32936500 | 0.29181200  | 4.71691400  |
| C | 2.87573600  | -2.83838200 | 1.19803000  |
| H | 3.71142600  | -3.14386600 | 0.57548300  |
| C | -1.96911100 | 3.20280400  | -0.67407900 |
| H | -2.51737400 | 2.81757600  | -1.54509900 |
| C | 1.62859900  | -3.14880400 | -2.20719100 |
| H | 0.71343900  | -2.65749200 | -2.56047300 |
| H | 1.40294400  | -3.66587600 | -1.27050000 |
| H | 1.89809900  | -3.90564800 | -2.95299300 |
| C | 1.49436100  | -3.21131000 | 3.13086000  |
| H | 1.25256900  | -3.77768600 | 4.02619200  |
| C | 2.11687300  | 2.84858500  | -2.14500700 |
| H | 2.24202800  | 1.80944900  | -2.46700100 |
| H | 2.62947700  | 2.97816400  | -1.18858400 |
| H | 2.61717700  | 3.48566700  | -2.88385400 |
| C | -2.49731300 | -3.09116600 | -0.81402900 |
| H | -3.54555800 | -3.21968300 | -0.51323400 |
| C | 2.59216700  | -3.56984800 | 2.34988300  |
| H | 3.21486600  | -4.41610400 | 2.62556400  |
| C | -1.61976400 | -3.87498400 | 0.17378600  |
| H | -1.85554000 | -4.94310500 | 0.10319500  |
| H | -1.78498100 | -3.56065100 | 1.20749500  |
| H | -0.55428900 | -3.75363600 | -0.04648600 |
| C | 0.53094900  | 2.55057600  | 0.86165400  |
| C | -1.86943800 | 4.73224900  | -0.80367000 |
| H | -2.87736400 | 5.16043800  | -0.75057800 |
| H | -1.42999600 | 5.06125000  | -1.74899100 |
| H | -1.29175300 | 5.16729800  | 0.01900400  |
| C | -2.95949200 | -0.11225400 | -3.13193300 |
| H | -2.81329100 | -1.04459900 | -3.68700100 |
| H | -2.00927500 | 0.43395300  | -3.13573300 |
| H | -3.68632300 | 0.48853300  | -3.69112200 |
| C | -3.47778300 | -0.36144900 | -1.70257400 |
| H | -3.55367100 | 0.61070400  | -1.20046300 |
| C | -2.34128800 | -3.61958100 | -2.24860700 |
| H | -1.32591600 | -3.46834000 | -2.62965700 |
| H | -3.03896300 | -3.15266000 | -2.94927700 |
| H | -2.53763200 | -4.69785800 | -2.26329900 |
| C | -0.04759800 | 3.05060900  | -3.43027100 |
| H | -1.09647000 | 3.36299400  | -3.42897900 |
| H | -0.00706500 | 2.00371300  | -3.75748600 |
| C | 3.08823800  | -1.45897600 | -3.39314100 |
| H | 3.31866300  | -2.21769600 | -4.14966000 |
| H | 3.94741000  | -0.78399700 | -3.33422400 |
| H | 2.22923900  | -0.88166100 | -3.75845100 |
| C | -4.87834200 | -0.99390800 | -1.73157800 |

|   |             |             |             |
|---|-------------|-------------|-------------|
| H | -5.54599600 | -0.36236200 | -2.32962300 |
| H | -4.87513300 | -1.98675200 | -2.19255400 |
| H | -5.32164500 | -1.07767600 | -0.73669900 |
| H | 0.47189800  | 3.64859800  | -4.18772700 |

**Optimized coordinates [Å] for [(Me<sub>2</sub>PhP)<sub>3</sub>Fe]<sup>+</sup>:**

|    |             |             |             |
|----|-------------|-------------|-------------|
| Fe | 0.15864700  | -0.18495700 | -0.99760500 |
| P  | -0.96396300 | 1.83613500  | -1.46879900 |
| P  | -0.45971000 | -2.22271000 | -0.05600500 |
| P  | 2.48332300  | -0.04211700 | -1.31271800 |
| C  | -2.26951200 | -2.22907300 | 0.27519800  |
| C  | -1.24228800 | 2.66879600  | 0.14383800  |
| C  | -2.79182200 | -2.06800000 | 1.56749900  |
| C  | 4.03948300  | -1.45884400 | 0.61288100  |
| C  | -0.64552100 | 3.89539800  | 0.47185600  |
| H  | -0.02266300 | 4.41711100  | -0.24807900 |
| C  | -2.04536400 | 2.02460300  | 1.10222300  |
| C  | -2.25786700 | 2.60533100  | 2.35188400  |
| H  | -2.89062600 | 2.10308200  | 3.07801800  |
| C  | 3.22714900  | -1.29680000 | -2.44619800 |
| H  | 4.32141000  | -1.26188800 | -2.43248400 |
| C  | 4.38348500  | -0.67980900 | 2.87994900  |
| H  | 4.81234400  | -0.82007700 | 3.86773800  |
| C  | -4.17301300 | -2.01522100 | 1.77110700  |
| H  | -4.56274900 | -1.90088900 | 2.77861400  |
| C  | 0.31804700  | -2.68760000 | 1.54990900  |
| H  | 1.38960600  | -2.83560300 | 1.38660000  |
| C  | 4.58567000  | -1.63819900 | 1.88602900  |
| H  | 5.17639900  | -2.52519600 | 2.09670500  |
| C  | 3.63159400  | 0.46273300  | 2.59776700  |
| H  | 3.47437400  | 1.21562800  | 3.36480600  |
| C  | 3.08377800  | 0.64390800  | 1.32807100  |
| H  | 2.50486800  | 1.54243900  | 1.12392600  |
| C  | -0.21389600 | -3.73662900 | -1.09026300 |
| H  | -0.63896300 | -4.62100300 | -0.60524200 |
| C  | -0.85737200 | 4.47065600  | 1.72657200  |
| H  | -0.39598100 | 5.42490200  | 1.96403800  |
| C  | -1.66358000 | 3.82933600  | 2.66729400  |
| H  | -1.83040700 | 4.28140300  | 3.64050500  |
| C  | -3.16079100 | -2.32427200 | -0.80796000 |

|   |             |             |             |
|---|-------------|-------------|-------------|
| H | -2.78261000 | -2.44971700 | -1.82004800 |
| C | 3.28247400  | 1.51522500  | -1.91488900 |
| H | 2.90698900  | 1.75077900  | -2.91604500 |
| C | -5.04871600 | -2.11906600 | 0.69010800  |
| H | -6.12191000 | -2.08279500 | 0.85179800  |
| C | -2.66656800 | 1.64342000  | -2.16885400 |
| H | -3.18590300 | 2.60610400  | -2.21168900 |
| C | -4.53907500 | -2.27482500 | -0.60131300 |
| H | -5.21468500 | -2.36443900 | -1.44718900 |
| C | 3.28537900  | -0.31297600 | 0.31747500  |
| C | -0.23933400 | 3.11974200  | -2.57722600 |
| H | 0.77356200  | 3.37847300  | -2.25945300 |
| H | 2.88637400  | -1.08677000 | -3.46523900 |
| H | 2.89836600  | -2.30593900 | -2.18218500 |
| H | 3.02794700  | 2.34344400  | -1.24739500 |
| H | 4.37260400  | 1.42000600  | -1.95477900 |
| H | 0.85730500  | -3.89883800 | -1.24746400 |
| H | -0.68525200 | -3.61298900 | -2.06920800 |
| H | -0.11632500 | -3.60480000 | 1.96078100  |
| H | 0.20638200  | -1.87762100 | 2.27591300  |
| H | -0.85392700 | 4.02578200  | -2.60403500 |
| H | -0.18044400 | 2.70383300  | -3.58796700 |
| H | -3.25191000 | 0.95080000  | -1.55774000 |
| H | -2.59769400 | 1.23085800  | -3.18107000 |
| H | -2.51936000 | 1.07248800  | 0.87329200  |
| H | 4.21949800  | -2.21267100 | -0.14752200 |
| H | -2.13022700 | -1.99363600 | 2.42490400  |

Mulliken atomic spin densities for **2**

1 Fe 3.253912  
 2 P -0.027171  
 3 P -0.010617  
 4 P -0.015937  
 5 C -0.004907  
 6 C 0.000171  
 7 H 0.000020

8 H 0.000301  
9 H 0.000144  
10 C -0.002614  
11 C 0.000097  
12 H -0.000011  
13 H 0.000408  
14 H -0.000066  
15 C 0.031834  
16 C 0.029533  
17 C 0.003234  
18 H -0.000001  
19 C 0.031179  
20 C -0.010984  
21 H 0.000534  
22 C 0.001306  
23 H 0.000886  
24 C 0.002732  
25 H -0.000716  
26 C -0.010913  
27 H 0.000375  
28 C -0.001689  
29 H 0.000232  
30 C -0.010241  
31 H 0.000537  
32 B -0.267025  
33 C -0.000540  
34 H -0.000389



35 H 0.000017  
36 H 0.000034  
37 C -0.004817  
38 H 0.000268  
39 C 0.002585  
40 H 0.000043  
41 C 0.007248  
42 H -0.000019  
43 C -0.006843  
44 H 0.000321  
45 C 0.003235  
46 H -0.000697  
47 C 0.005544  
48 H -0.000087  
49 C -0.001772  
50 H 0.000308  
51 C 0.002233  
52 H -0.001672  
53 H -0.000551  
54 H 0.000270  
55 C 0.006515  
56 H -0.000827  
57 C -0.000211  
58 H 0.000126  
59 H 0.000133  
60 H -0.000055  
61 C 0.009143

62 H 0.000978  
63 C -0.007547  
64 H 0.000405  
65 C -0.000028  
66 H 0.000024  
67 H -0.000020  
68 H -0.001178  
69 C -0.002002  
70 C 0.000981  
71 H 0.000333  
72 H -0.000026  
73 H -0.000056  
74 C 0.001914  
75 H -0.000172  
76 H -0.000830  
77 H 0.000312  
78 C -0.004719  
79 H 0.000585  
80 C -0.000384  
81 H -0.000422  
82 H -0.000009  
83 H -0.000029  
84 C 0.000389  
85 H -0.000118  
86 H -0.000747  
87 C -0.000078  
88 H 0.000160

89 H 0.000030

90 H -0.000011

91 C -0.001228

92 H -0.000593

93 H 0.000076

94 H 0.000043

95 H -0.000115

Sum of Mulliken spin densities = 3.00000

**Figure 23.** MO and spin density diagram of  $[(\text{TPB})\text{Fe}]^+ \mathbf{2}$  optimized at the B3LYP/6-31G(d) level

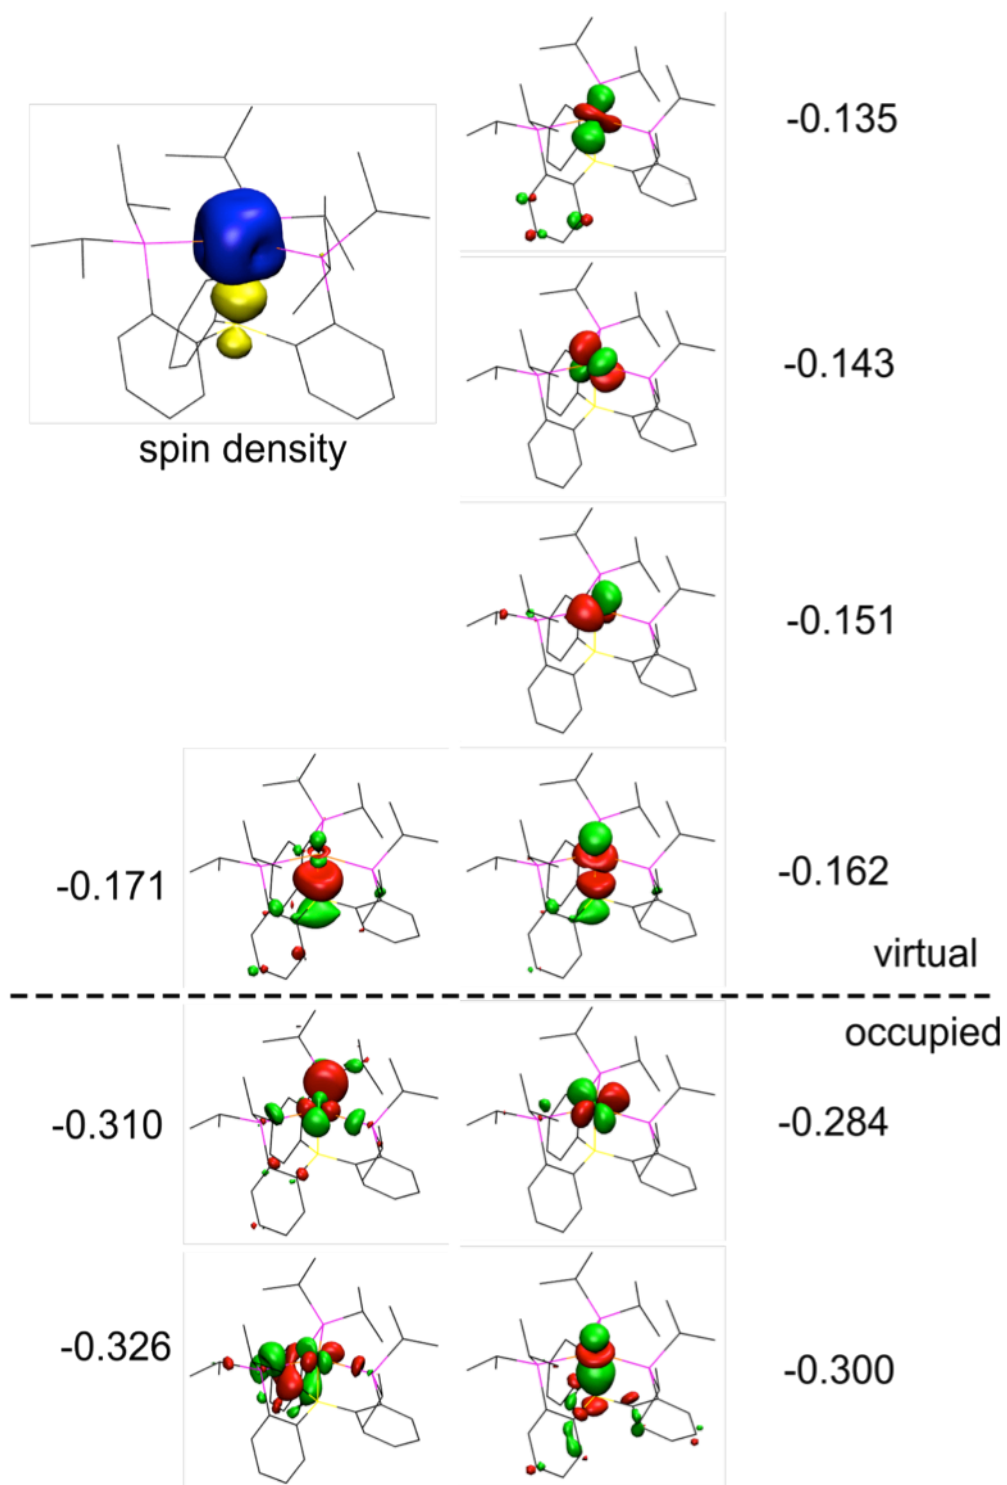

**Figure 24.** MO diagram offering a tentative explanation for the T-shaped distortion of 2

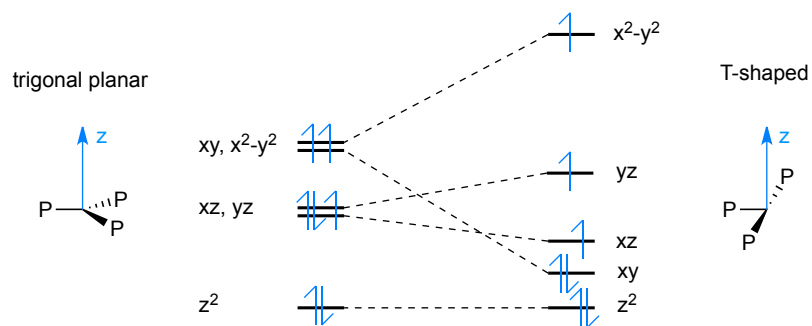

Highest doubly occupied *d* orbital:

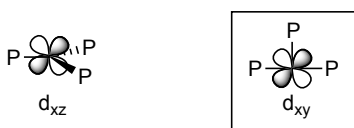

strong pi-backdonation to  
all three phosphine ligands

**Figure 25.** Variable Temperature Magnetic data for 2-5

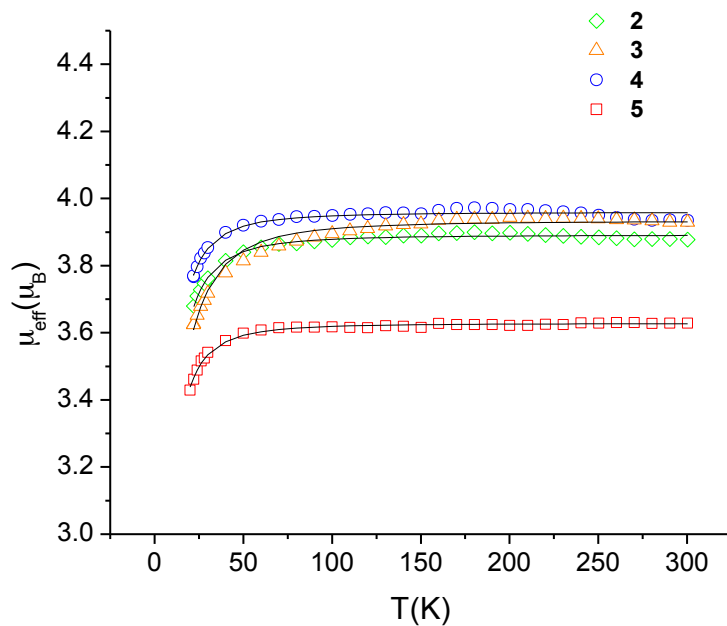

Data corrected for ~15% diamagnetic impurity of 12-crown-4, verified by  $^1\text{H}$  NMR integration, in 5

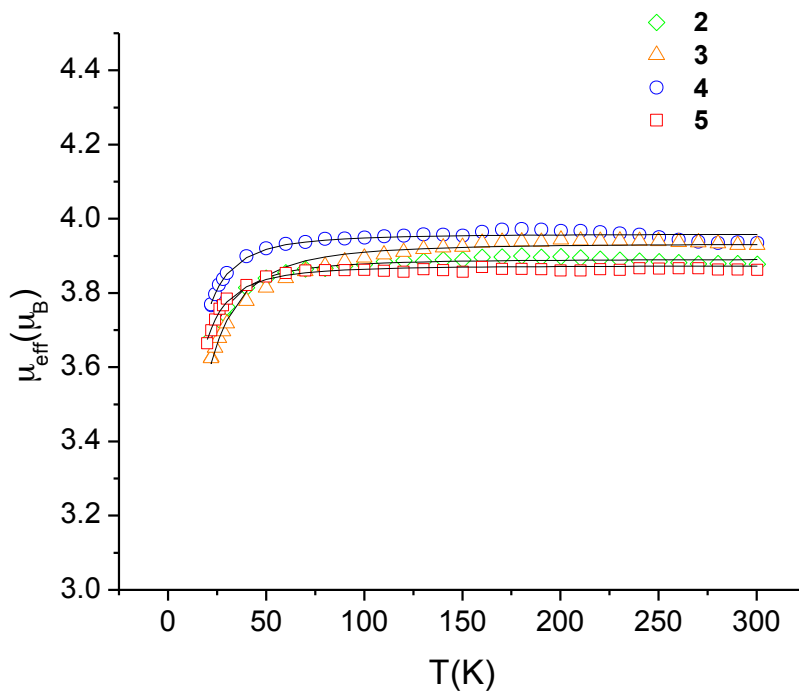

### Simulation Parameters

| Compound                                                                                 | S   | g     | D (cm <sup>-1</sup> ) |
|------------------------------------------------------------------------------------------|-----|-------|-----------------------|
| [TPB <sup>IPr</sup> Fe][BAr <sup>F</sup> <sub>4</sub> ]                                  | 3/2 | 2.009 | 13.933                |
| [TPB <sup>IPr</sup> Fe(N <sub>2</sub> H <sub>4</sub> )] [BAr <sup>F</sup> <sub>4</sub> ] | 3/2 | 2.031 | 19.937                |
| [TPB <sup>IPr</sup> Fe(NH <sub>3</sub> )] [BAr <sup>F</sup> <sub>4</sub> ]               | 3/2 | 2.044 | 12.162                |
| (TPB <sup>IPr</sup> )Fe(NH <sub>2</sub> )                                                | 3/2 | 2.000 | 11.348                |

**Table 1.** Product quantification for the decomposition of **3** to **4**

| <b>Run</b> | <b>Equiv H<sub>2</sub></b> | <b>Equiv N<sub>2</sub>H<sub>4</sub></b> | <b>Equiv NH<sub>3</sub></b> |
|------------|----------------------------|-----------------------------------------|-----------------------------|
| 1          | 0.01                       | None det.                               | 0.09                        |
| 2          | 0.009                      | None det.                               | 0.12                        |
| 3          | None det.                  | None det.                               | 0.14                        |



**Table 2.** Crystal data and structure refinement for (TPB)FeMe (1)

|                                   |                                             |                                 |
|-----------------------------------|---------------------------------------------|---------------------------------|
| Identification code               | jsa200m                                     |                                 |
| Empirical formula                 | C37 H57 B Cl Fe P3                          |                                 |
| Formula weight                    | 696.85                                      |                                 |
| Temperature                       | 293(2) K                                    |                                 |
| Wavelength                        | 0.71073 Å                                   |                                 |
| Crystal system                    | Triclinic                                   |                                 |
| Space group                       | P-1                                         |                                 |
| Unit cell dimensions              | a = 10.9554(3) Å                            | $\alpha = 91.4010(10)^\circ$ .  |
|                                   | b = 11.5075(3) Å                            | $\beta = 95.4060(10)^\circ$ .   |
|                                   | c = 15.9312(4) Å                            | $\gamma = 117.8130(10)^\circ$ . |
| Volume                            | 1763.16(8) Å <sup>3</sup>                   |                                 |
| Z                                 | 2                                           |                                 |
| Density (calculated)              | 1.313 Mg/m <sup>3</sup>                     |                                 |
| Absorption coefficient            | 0.665 mm <sup>-1</sup>                      |                                 |
| F(000)                            | 744                                         |                                 |
| Crystal size                      | .456 x .304 x .209 mm <sup>3</sup>          |                                 |
| Theta range for data collection   | 1.29 to 27.10°.                             |                                 |
| Index ranges                      | -14 ≤ h ≤ 14, -14 ≤ k ≤ 14, -20 ≤ l ≤ 20    |                                 |
| Reflections collected             | 36496                                       |                                 |
| Independent reflections           | 7758 [R(int) = 0.0311]                      |                                 |
| Completeness to theta = 27.10°    | 99.8 %                                      |                                 |
| Refinement method                 | Full-matrix least-squares on F <sup>2</sup> |                                 |
| Data / restraints / parameters    | 7758 / 338 / 402                            |                                 |
| Goodness-of-fit on F <sup>2</sup> | 1.086                                       |                                 |
| Final R indices [I > 2σ(I)]       | R1 = 0.0321, wR2 = 0.0813                   |                                 |
| R indices (all data)              | R1 = 0.0371, wR2 = 0.0860                   |                                 |
| Largest diff. peak and hole       | 0.890 and -0.305 e.Å <sup>-3</sup>          |                                 |

**Table 3.** Crystal data and structure refinement for [(TPB)Fe][BAR<sup>F</sup><sub>4</sub>] (2)

|                                   |                                                                                                                 |          |
|-----------------------------------|-----------------------------------------------------------------------------------------------------------------|----------|
| Identification code               | mem130                                                                                                          |          |
| Empirical formula                 | C <sub>68</sub> H <sub>66</sub> B <sub>2</sub> F <sub>24</sub> Fe N <sub>0</sub> P <sub>3</sub> Si <sub>0</sub> |          |
| Formula weight                    | 1509.59                                                                                                         |          |
| Temperature                       | 100(2) K                                                                                                        |          |
| Wavelength                        | 0.71073 Å                                                                                                       |          |
| Crystal system                    | Orthorhombic                                                                                                    |          |
| Space group                       | Pbca                                                                                                            |          |
| Unit cell dimensions              | a = 26.4056(9) Å                                                                                                | α = 90°. |
|                                   | b = 19.7833(7) Å                                                                                                | β = 90°. |
|                                   | c = 26.4402(9) Å                                                                                                | γ = 90°. |
| Volume                            | 13812.1(8) Å <sup>3</sup>                                                                                       |          |
| Z                                 | 8                                                                                                               |          |
| Density (calculated)              | 1.452 Mg/m <sup>3</sup>                                                                                         |          |
| Absorption coefficient            | 0.393 mm <sup>-1</sup>                                                                                          |          |
| F(000)                            | 6168                                                                                                            |          |
| Crystal size                      | 0.32 x 0.30 x 0.26 mm <sup>3</sup>                                                                              |          |
| Theta range for data collection   | 1.85 to 33.73°.                                                                                                 |          |
| Index ranges                      | -35 ≤ h ≤ 41, -30 ≤ k ≤ 30, -41 ≤ l ≤ 41                                                                        |          |
| Reflections collected             | 379408                                                                                                          |          |
| Independent reflections           | 27590 [R(int) = 0.0500]                                                                                         |          |
| Completeness to theta = 33.73°    | 100.0 %                                                                                                         |          |
| Absorption correction             | Semi-empirical from equivalents                                                                                 |          |
| Max. and min. transmission        | 0.9046 and 0.8844                                                                                               |          |
| Refinement method                 | Full-matrix least-squares on F <sup>2</sup>                                                                     |          |
| Data / restraints / parameters    | 27590 / 18 / 951                                                                                                |          |
| Goodness-of-fit on F <sup>2</sup> | 1.062                                                                                                           |          |
| Final R indices [I > 2σ(I)]       | R1 = 0.0496, wR2 = 0.1239                                                                                       |          |
| R indices (all data)              | R1 = 0.0744, wR2 = 0.1400                                                                                       |          |
| Largest diff. peak and hole       | 0.740 and -0.532 e.Å <sup>-3</sup>                                                                              |          |

**Table 4.** Crystal data and structure refinement for [(TPB)Fe(N<sub>2</sub>H<sub>4</sub>)] [BAr<sup>F</sup><sub>4</sub>] (**3**)

|                                   |                                                                                                 |          |
|-----------------------------------|-------------------------------------------------------------------------------------------------|----------|
| Identification code               | jsa19_0m                                                                                        |          |
| Empirical formula                 | C <sub>78</sub> H <sub>68</sub> B <sub>2</sub> F <sub>24</sub> Fe N <sub>2</sub> P <sub>3</sub> |          |
| Formula weight                    | 1659.72                                                                                         |          |
| Temperature                       | 296(2) K                                                                                        |          |
| Wavelength                        | 0.71073 Å                                                                                       |          |
| Crystal system                    | Orthorhombic                                                                                    |          |
| Space group                       | Pbca                                                                                            |          |
| Unit cell dimensions              | a = 20.0031(7) Å                                                                                | α = 90°. |
|                                   | b = 25.7862(8) Å                                                                                | β = 90°. |
|                                   | c = 26.6970(8) Å                                                                                | γ = 90°. |
| Volume                            | 13770.4(8) Å <sup>3</sup>                                                                       |          |
| Z                                 | 8                                                                                               |          |
| Density (calculated)              | 1.601 Mg/m <sup>3</sup>                                                                         |          |
| Absorption coefficient            | 0.404 mm <sup>-1</sup>                                                                          |          |
| F(000)                            | 6776                                                                                            |          |
| Crystal size                      | 0.46 x 0.26 x 0.15 mm <sup>3</sup>                                                              |          |
| Theta range for data collection   | 2.00 to 32.59°.                                                                                 |          |
| Index ranges                      | -30 ≤ h ≤ 30, -39 ≤ k ≤ 39, -40 ≤ l ≤ 40                                                        |          |
| Reflections collected             | 347031                                                                                          |          |
| Independent reflections           | 25087 [R(int) = 0.0696]                                                                         |          |
| Completeness to theta = 32.59°    | 99.9 %                                                                                          |          |
| Max. and min. transmission        | 0.9419 and 0.8361                                                                               |          |
| Refinement method                 | Full-matrix least-squares on F <sup>2</sup>                                                     |          |
| Data / restraints / parameters    | 25087 / 971 / 981                                                                               |          |
| Goodness-of-fit on F <sup>2</sup> | 0.937                                                                                           |          |
| Final R indices [I > 2σ(I)]       | R1 = 0.0531, wR2 = 0.1373                                                                       |          |
| R indices (all data)              | R1 = 0.0872, wR2 = 0.1681                                                                       |          |
| Largest diff. peak and hole       | 1.295 and -0.755 e.Å <sup>-3</sup>                                                              |          |

**Table 5.** Crystal data and structure refinement for [(TPB)Fe(NH<sub>3</sub>)][(BAr<sup>F</sup><sub>4</sub>)] (4)

|                                   |                                                                                                                |
|-----------------------------------|----------------------------------------------------------------------------------------------------------------|
| Identification code               | xds_ascii                                                                                                      |
| Empirical formula                 | C <sub>68</sub> H <sub>80</sub> B <sub>4</sub> F <sub>24</sub> Fe N <sub>2</sub> O <sub>2</sub> P <sub>3</sub> |
| Formula weight                    | 1605.34                                                                                                        |
| Temperature                       | 293(2) K                                                                                                       |
| Wavelength                        | 0.71073 Å                                                                                                      |
| Crystal system                    | Orthorhombic                                                                                                   |
| Space group                       | Pbca                                                                                                           |
| Unit cell dimensions              | a = 19.846(4) Å      α = 90°.<br>b = 25.821(5) Å      β = 90°.<br>c = 26.862(5) Å      γ = 90°.                |
| Volume                            | 13765(5) Å <sup>3</sup>                                                                                        |
| Z                                 | 8                                                                                                              |
| Density (calculated)              | 1.549 Mg/m <sup>3</sup>                                                                                        |
| Absorption coefficient            | 0.402 mm <sup>-1</sup>                                                                                         |
| F(000)                            | 6600                                                                                                           |
| Crystal size                      | .25 x .15 x .15 mm <sup>3</sup>                                                                                |
| Theta range for data collection   | 1.50 to 25.18°.                                                                                                |
| Index ranges                      | -23 ≤ h ≤ 23, -30 ≤ k ≤ 30, -32 ≤ l ≤ 32                                                                       |
| Reflections collected             | 155016                                                                                                         |
| Independent reflections           | 12232 [R(int) = 0.0175]                                                                                        |
| Completeness to theta = 25.18°    | 99.0 %                                                                                                         |
| Refinement method                 | Full-matrix least-squares on F <sup>2</sup>                                                                    |
| Data / restraints / parameters    | 12232 / 972 / 961                                                                                              |
| Goodness-of-fit on F <sup>2</sup> | 1.041                                                                                                          |
| Final R indices [I > 2σ(I)]       | R1 = 0.0606, wR2 = 0.1680                                                                                      |
| R indices (all data)              | R1 = 0.0620, wR2 = 0.1692                                                                                      |
| Largest diff. peak and hole       | 1.741 and -1.346 e.Å <sup>-3</sup>                                                                             |

**Table 6.** Crystal data and structure refinement for (TPB)FeNH<sub>2</sub> (**5**)

|                                   |                                                       |                 |
|-----------------------------------|-------------------------------------------------------|-----------------|
| Identification code               | jsa23_0m                                              |                 |
| Empirical formula                 | C <sub>36</sub> H <sub>56</sub> B Fe N P <sub>3</sub> |                 |
| Formula weight                    | 662.39                                                |                 |
| Temperature                       | 100(2) K                                              |                 |
| Wavelength                        | 0.71073 Å                                             |                 |
| Crystal system                    | Triclinic                                             |                 |
| Space group                       | P-1                                                   |                 |
| Unit cell dimensions              | a = 10.9229(9) Å                                      | α = 77.268(7)°. |
|                                   | b = 11.2493(13) Å                                     | β = 84.862(5)°. |
|                                   | c = 16.5084(15) Å                                     | γ = 61.117(4)°. |
| Volume                            | 1732.1(3) Å <sup>3</sup>                              |                 |
| Z                                 | 2                                                     |                 |
| Density (calculated)              | 1.483 Mg/m <sup>3</sup>                               |                 |
| Absorption coefficient            | 0.615 mm <sup>-1</sup>                                |                 |
| F(000)                            | 812                                                   |                 |
| Crystal size                      | 0.23 x 0.15 x 0.15 mm <sup>3</sup>                    |                 |
| Theta range for data collection   | 2.11 to 28.28°.                                       |                 |
| Index ranges                      | -14 ≤ h ≤ 14, -14 ≤ k ≤ 14, -22 ≤ l ≤ 22              |                 |
| Reflections collected             | 52847                                                 |                 |
| Independent reflections           | 8561 [R(int) = 0.0706]                                |                 |
| Completeness to theta = 28.28°    | 99.7 %                                                |                 |
| Max. and min. transmission        | 0.9134 and 0.8715                                     |                 |
| Refinement method                 | Full-matrix least-squares on F <sup>2</sup>           |                 |
| Data / restraints / parameters    | 8561 / 2 / 397                                        |                 |
| Goodness-of-fit on F <sup>2</sup> | 1.120                                                 |                 |
| Final R indices [I > 2σ(I)]       | R1 = 0.0545, wR2 = 0.1236                             |                 |
| R indices (all data)              | R1 = 0.0810, wR2 = 0.1324                             |                 |
| Largest diff. peak and hole       | 1.541 and -0.646 e.Å <sup>-3</sup>                    |                 |

**Table 7.** Crystal data and structure refinement for (TPB)FeOH (6)

|                                   |                                                         |                 |
|-----------------------------------|---------------------------------------------------------|-----------------|
| Identification code               | jsa21_0m                                                |                 |
| Empirical formula                 | C <sub>36</sub> H <sub>56</sub> B Fe N O P <sub>3</sub> |                 |
| Formula weight                    | 678.39                                                  |                 |
| Temperature                       | 100(2) K                                                |                 |
| Wavelength                        | 0.71073 Å                                               |                 |
| Crystal system                    | Triclinic                                               |                 |
| Space group                       | P-1                                                     |                 |
| Unit cell dimensions              | a = 10.9554(4) Å                                        | α = 77.466(2)°. |
|                                   | b = 11.3311(4) Å                                        | β = 78.105(2)°. |
|                                   | c = 16.6454(7) Å                                        | γ = 61.338(2)°. |
| Volume                            | 1757.30(12) Å <sup>3</sup>                              |                 |
| Z                                 | 2                                                       |                 |
| Density (calculated)              | 1.282 Mg/m <sup>3</sup>                                 |                 |
| Absorption coefficient            | 0.595 mm <sup>-1</sup>                                  |                 |
| F(000)                            | 726                                                     |                 |
| Crystal size                      | 10.00 x 0.29 x 0.17 mm <sup>3</sup>                     |                 |
| Theta range for data collection   | 2.07 to 37.78°.                                         |                 |
| Index ranges                      | -18 ≤ h ≤ 17, -19 ≤ k ≤ 19, -28 ≤ l ≤ 28                |                 |
| Reflections collected             | 142106                                                  |                 |
| Independent reflections           | 18846 [R(int) = 0.0433]                                 |                 |
| Completeness to theta = 37.78°    | 100.0 %                                                 |                 |
| Max. and min. transmission        | 0.9056 and 0.0661                                       |                 |
| Refinement method                 | Full-matrix least-squares on F <sup>2</sup>             |                 |
| Data / restraints / parameters    | 18846 / 1 / 382                                         |                 |
| Goodness-of-fit on F <sup>2</sup> | 1.024                                                   |                 |
| Final R indices [I > 2σ(I)]       | R1 = 0.0316, wR2 = 0.0745                               |                 |
| R indices (all data)              | R1 = 0.0477, wR2 = 0.0810                               |                 |
| Largest diff. peak and hole       | 0.810 and -0.493 e.Å <sup>-3</sup>                      |                 |

**Figure 26.** Crystal Structure for (TPB)FeOH (**6**)

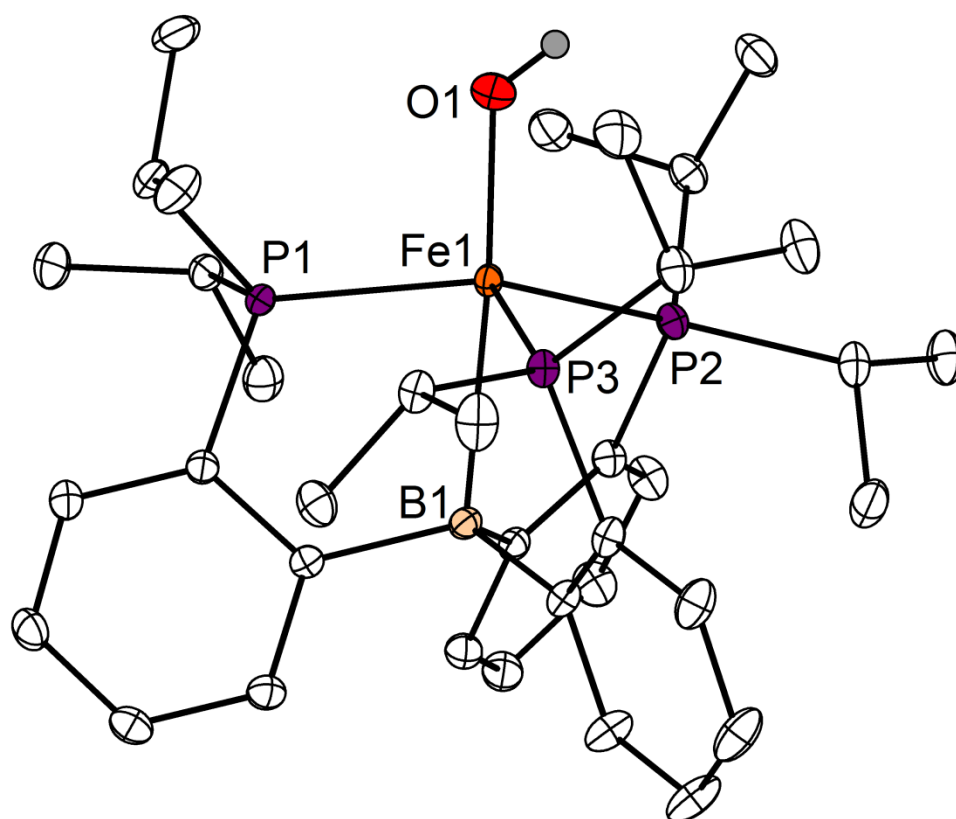

Note that hydrogens have been omitted for clarity.
